# Supplementary material for: Breast cancer cell secretome analysis to decipher miRNA regulating the tumor microenvironment and discover potential biomarkers
Source: Heliyon. 2023 Apr 14;9(4):e15421. doi: 10.1016/j.heliyon.2023.e15421 (PMC10148110; doi:10.1016/j.heliyon.2023.e15421)
Supplement: Multimedia component 1 [file mmc1.xlsx]

## Sheet: Sheet1
	miR526b		miR655
Protein ID	Log2 FC	-Log10 P-value	Log2 FC	-Log10 P-value
A0A075B716	1.28096	0.0553693	1.27501	0.0360706
A0A075B724	0.485427	0.0392914	-0.836501	0.0459988
A0A075B736	0.650765	0.177309	1.47508	0.290137
A0A075B767	-1.35845	0.19552	-1.12029	0.0902835
A0A075B7B4	-0.621488	0.0378675	0.443607	0.0360706
A0A087WTP3	0.526069	0.122456	0.464668	0.0469655
A0A087WUI2	0.0840643	0.0009565	0.367371	0.0169604
A0A087WUK2	0	0.0009565	0.0840643	0.0169604
A0A087WUM2	-0.535332	0.00405784	-0.643856	0.0360706
A0A087WUM9	0.238787	0.0009565	-1.21759	0.0469655
A0A087WUZ3	-0.395929	0.00405784	-0.454032	0.0316105
A0A087WV01	0.378512	0.0856568	0.475085	0.0997968
A0A087WVQ9	0.765535	0.19552	0.464668	0.161214
A0A087WVV2	-0.0892673	0.0009565	0.411426	0.0360706
A0A087WWT3	2.86987	0.153292	2.17313	0.0672219
A0A087WWU8	-0.251539	0.0368263	-0.286304	0.0360706
A0A087WWY3	0.485427	0.19552	-0.0291463	0.0169604
A0A087WYL5	-1.88897	0.122456	-0.473931	0.0332015
A0A087WYS6	-0.0291463	0.0009565	0.124328	0.0101499
A0A087X080	-0.0144996	0.0009565	0.263034	0.0360706
A0A087X0F1	0.687061	0.0856568	1.04264	0.0626828
A0A087X142	-2.55639	1.01547	-2.8365	0.683191
A0A087X1X7	1.1375	0.0613802	0.831877	0.0360706
A0A087X271	0.275007	0.0856568	1.57046	0.898941
A0A087X2D0	1.72683	0.137153	0.956057	0.0360706
A0A0A0MRQ5	-0.621488	0.0638886	-0.120294	0.0169604
A0A0A0MSI0	0.669027	0.118273	-0.0291463	0.00243888
A0A0A0MSP3	0.422233	0.19552	-0.643856	0.175289
A0A0A0MTC1	0.226509	0.0009565	-0.454032	0.0205427
A0A0A0MTR7	0.226509	0.0009565	-0.454032	0.0205427
A0A0A0MTS2	-1.2863	0.122456	-0.152003	0.0169604
A0A0B4J1R6	-0.943416	0.19552	-1.39593	0.192668
A0A0B4J269	0.443607	0.19552	0.887525	0.205512
A0A0B4J2A2	-1.35845	0.19552	-1.12029	0.0902835
A0A0B4J2B4	1.83188	0.19552	2.35332	0.505011
A0A0B4J2C3	-1.08927	0.0856568	-1.25154	0.154964
A0A0C4DFM8	0.863938	0.128077	0.214125	0.0169604
A0A0C4DG17	0.773996	0.137153	0.536053	0.0459988
A0A0C4DG33	0.163499	0.0009565	0.687061	0.0695604
A0A0C4DGB6	1.29278	0.122456	0.773996	0.0360706
A0A0D9SEM4	0.321928	0.00405784	1.15704	0.175289
A0A0D9SET8	0.378512	0.0368263	-0.152003	0.0169604
A0A0D9SF54	1.9486	0.403403	1.91839	0.683191
A0A0D9SFL3	-1.73697	0.366027	-1.12029	0.112664
A0A0D9SFS3	0.704872	0.0553693	0.555816	0.0360706
A0A0D9SGF6	1.9486	0.403403	1.91839	0.683191
A0A0G2JIW1	0.124328	0.0613802	-0.104697	0.0360706
A0A0G2JLD8	-0.217591	0.0009565	0.495695	0.0360706
A0A0H2UH34	-1.35845	0.19552	-1.12029	0.0902835
A0A0J9YWE8	1.63691	0.151626	0.250962	0.0169604
A0A0J9YWZ2	1.63691	0.151626	0.250962	0.0169604
A0A0J9YX90	-1.2863	0.122456	-0.152003	0.0169604
A0A0J9YXP8	-1.2863	0.122456	-0.152003	0.0169604
A0A0J9YYH3	-1.2863	0.122456	-0.152003	0.0169604
A0A0S2Z4G6	-0.37707	0.0368263	-0.395929	0.0360706
A0A0U1RQJ0	0.226509	0.0009565	-0.713119	0.0459988
A0A0U1RR32	-3.18442	1.1831	-1.55639	0.780677
A0A0U1RRE1	-2.55639	1.01547	-2.8365	0.683191
A0A0U1RRH1	-0.0144996	0.0009565	0.263034	0.0360706
A0A0U1RRH7	-3.18442	1.1831	-1.55639	0.780677
A0A0U1RRH9	-2.55639	1.01547	-2.8365	0.683191
A0A0X1KG73	-0.0144996	0.0009565	0.263034	0.0360706
A0A1B0GTF2	-0.0144996	0.0009565	0.263034	0.0360706
A0A1B0GUZ7	-1.47393	0.0856568	-0.577767	0.0188612
A0A1B0GV68	4.81967	0.0856568	4.81455	0.0459988
A0A1B0GVC3	1.57531	0.122456	0.226509	0.0169604
A0A1B0GVU7	0.722466	0.0856568	0.713696	0.0459988
A0A1B0GWA9	1.57531	0.122456	0.226509	0.0169604
A0A1B0GXJ2	-1.18442	0.122456	-1.59946	0.640354
A0A1C7CYX9	0.0143553	0.0009565	0.0285692	0.00256993
A0A1W2PP22	0.669027	0.172954	0.298658	0.0360706
A0A1W2PP34	-1	0.122456	-0.152003	0.0169604
A0A1W2PP35	-0.234465	0.00405784	-0.0588937	0.0169604
A0A1W2PPH7	-1	0.122456	-0.152003	0.0169604
A0A1W2PPL4	-1	0.122456	-0.152003	0.0169604
A0A1W2PPS1	-0.234465	0.00405784	-0.0588937	0.0169604
A0A1W2PPZ5	0.0840643	0.0009565	-0.621488	0.0459988
A0A1W2PQ51	0.226509	0.0009565	-0.713119	0.0459988
A0A1W2PQ74	-0.535332	0.0045842	-0.0892673	0.00572685
A0A1W2PQD4	-1	0.122456	-0.152003	0.0169604
A0A1W2PQL0	-1	0.122456	-0.152003	0.0169604
A0A1W2PQM2	-0.286304	0.0035759	0.124328	0.0169604
A0A1W2PQS6	0.0976108	0.0009565	-0.234465	0.0169604
A0A1W2PRR1	0.344828	0.0009565	-1.47393	0.267365
A0A1W2PRZ7	-0.535332	0.0045842	-0.0892673	0.00572685
A0A1X7SBS1	-0.234465	0.00405784	-0.0588937	0.0169604
A0A1X7SBZ2	0.226509	0.0009565	-0.713119	0.0459988
A0A286YER3	-0.395929	0.0387688	0.0285692	0.00243888
A0A286YF22	-1.02915	0.19552	-0.321928	0.0360706
A0A286YF78	-1.2863	0.19552	-0.556393	0.0360706
A0A286YFA2	-1.02915	0.19552	-0.321928	0.0360706
A0A286YFB2	-0.395929	0.0387688	0.0285692	0.00243888
A0A286YFC8	-0.395929	0.0387688	0.0285692	0.00243888
A0A286YFL2	-1.02915	0.19552	-0.321928	0.0360706
A0A286YFM8	-1.02915	0.19552	-0.321928	0.0360706
A0A2C9F2M7	-1.02915	0.19552	-0.321928	0.0360706
A0A2R2Y2Q3	-1.35845	0.19552	-1.32193	0.0695604
A0A2R8Y488	-0.321928	0.024798	0.565597	0.0716554
A0A2R8Y4C3	-0.971431	0.191114	-1.51457	0.138406
A0A2R8Y5S7	-1.2863	0.132061	-1.02915	0.0469655
A0A2R8Y5V9	-1.35845	0.19552	-1.32193	0.0695604
A0A2R8Y619	2.05311	0.19552	1.66448	0.0469655
A0A2R8Y660	-0.321928	0.024798	0.565597	0.0716554
A0A2R8Y6C7	-1.2863	0.122456	-0.152003	0.0169604
A0A2R8Y6G6	-0.217591	0.0009565	-0.454032	0.0360706
A0A2R8Y6I8	-1.02915	0.19552	-1.08927	0.192668
A0A2R8Y6J3	-0.0439433	0.0009565	0.0143553	0.00130484
A0A2R8Y6L3	0.0976108	0.0009565	-0.234465	0.0169604
A0A2R8Y6R5	1.31034	0.122456	0.378512	0.0169604
A0A2R8Y793	0.704872	0.122456	0.238787	0.0491972
A0A2R8Y798	0	0.0009565	0.263034	0.0188612
A0A2R8Y7H1	0.0976108	0.0009565	-0.234465	0.0169604
A0A2R8Y7M3	-1.2863	0.132061	-1.02915	0.0469655
A0A2R8Y879	-0.943416	0.19552	-0.971431	0.186686
A0A2R8YDN5	-0.321928	0.024798	0.565597	0.0716554
A0A2R8YE05	-1.35845	0.19552	-1.32193	0.0695604
A0A2R8YEA7	1.37295	0.19552	0.641546	0.112664
A0A2R8YEG5	0	0.0009565	0.263034	0.0188612
A0A2R8YEM5	-0.943416	0.19552	-0.971431	0.186686
A0A2R8YEU4	-1.35845	0.19552	-1.32193	0.0695604
A0A2R8YF08	-1.2863	0.122456	-0.152003	0.0169604
A0A2R8YFE2	0.495695	0.19552	1.26303	0.640354
A0A2R8YFH6	0.0976108	0.0009565	-0.234465	0.0169604
A0A2R8YGF8	0.356144	0.137153	0.226509	0.0360706
A0A2R8YGX3	-1.35845	0.19552	-1.32193	0.0695604
A0A2R8YH90	-1.35845	0.19552	-1.32193	0.0695604
A0A2U3TZH3	0.485427	0.172954	0.632268	0.245117
A0A2U3TZU2	-1.2863	0.122456	-0.152003	0.0169604
A0A2U3TZY2	1.31034	0.122456	0.378512	0.0169604
A0A3B3IS11	-2.39593	0.19552	-1.25154	0.0459988
A0A3B3ITI4	0.536053	0.0613802	1.09085	0.112664
A0A3B3ITK0	0.526069	0.0856568	1.07724	0.113735
A0A494BZZ2	-1.35845	0.19552	-1.32193	0.0695604
A0A494C024	-0.971431	0.191114	-1.51457	0.138406
A0A494C0G0	-0.577767	0.0856568	-0.535332	0.0459988
A0A494C0P6	-1.35845	0.19552	-1.32193	0.0695604
A0A494C157	-1.59946	0.151626	0.189034	0.0169604
A0A494C189	-2.39593	0.19552	-1.25154	0.0459988
A0A494C1E9	-1.59946	0.151626	0.189034	0.0169604
A0A499FI48	1.30451	0.19552	0.485427	0.0360706
A1L2Z2	0.863938	0.128077	0.214125	0.0169604
A2A274	0.0703893	0.0009565	0.485427	0.0360706
A2A2D0	-0.888969	0.0387688	-0.643856	0.0360706
A2IDB2	1.63691	0.151626	0.250962	0.0169604
A5A3E0	-0.136062	0.0009565	-0.0588937	0.0169604
A6ND91	-0.643856	0.19552	-0.340075	0.0220479
A6NFQ9	-2.55639	1.01547	-2.8365	0.683191
A6NGQ3	-3.05889	0.556581	-3.47393	0.700929
A6NHL2	-0.761213	0.0553693	-0.599462	0.0360706
A6NHL2-2	-0.761213	0.0553693	-0.599462	0.0360706
A6NL76	0.214125	0.0856568	0.485427	0.175289
A6NMH6	-2.55639	1.01547	-2.8365	0.683191
A6NMY6	-0.68966	0.137153	-0.358454	0.0360706
A6NNZ2	1.28688	0.162159	1.38957	0.276955
A6PW80	-0.321928	0.024798	0.565597	0.0716554
A7XZE4	-0.37707	0.0368263	-0.395929	0.0360706
A8K7Q2	0.485427	0.19552	-0.395929	0.0360706
A8MU27	0.0703893	0.0009565	-0.514573	0.0360706
A8MUA9	0.0703893	0.0009565	-0.514573	0.0360706
A8MVZ9	0.790772	0.0856568	0.978196	0.0459988
A8MWD9	-1.02915	0.122456	-1.12029	0.0816551
A8MX94	0.189034	0.0009565	0.238787	0.0188612
A8MXH2	-0.0588937	0.0009565	0.443607	0.0360706
B0AZS6	0.0143553	0.0009565	-0.0144996	0.00243888
B0QY70	1.1177	0.0856568	0.0565835	0.00572685
B0QYK0	-1.73697	0.366027	-1.12029	0.112664
B1AH99	-0.556393	0.0856568	0.0976108	0.0101499
B1AKZ5	-1.8365	0.19552	-1.73697	0.780677
B1AMS2	-2.55639	1.01547	-2.8365	0.683191
B2RPK0	0.298658	0.102208	0.731183	0.683191
B3KQV6	-0.473931	0.0009565	-1.51457	0.0672219
B4DDF4	0.275007	0.0856568	1.57046	0.898941
B4DJF2	0.815575	0.0856568	-0.234465	0.0169604
B4DJK0	0.321928	0.00405784	1.15704	0.175289
B4DNK4	1.35614	0.19552	0.526069	0.0695604
B4DT28	0.333424	0.0009565	0.910733	0.0459988
B4DUA4	0.321928	0.00405784	1.15704	0.175289
B4DUR8	1.20789	0.19552	0.918386	0.205512
B4DUT8	0.275007	0.0856568	1.57046	0.898941
B4DXW1	0.275007	0.0009565	-0.340075	0.0169604
B5MCX3	-0.836501	0.0856568	-0.621488	0.0459988
B5MD17	-0.120294	0.0009565	-0.168123	0.0169604
B5MD47	-1.18442	0.122456	-1.59946	0.640354
B5MDF5	-0.0740006	0.0009565	0.475085	0.0360706
B7WNR0	1.29278	0.122456	0.773996	0.0360706
B7WPL9	0.31034	0.0009565	0.15056	0.0169604
B7Z2E6	0.0143553	0.0009565	-0.0144996	0.00243888
B7Z4C8	0.111031	0.0009565	0.124328	0.0169604
B7Z4E3	0.111031	0.0009565	0.124328	0.0169604
B7Z596	-1.35845	0.19552	-1.32193	0.0695604
B7Z645	0.333424	0.0009565	0.910733	0.0459988
B7Z6Z4	0.0565835	0.0009565	0.286881	0.0360706
B7Z9C2	-0.152003	0.00405784	0.298658	0.0360706
B7ZAR1	-0.104697	0.0009565	0.495695	0.0360706
B7ZL86	4.852	0.0856568	4.95373	0.0459988
B8ZZ51	-0.104697	0.0009565	1	0.103915
B8ZZ54	-0.915936	0.0378675	-1.12029	0.0360706
B8ZZJ2	0.0703893	0.0009565	0.163499	0.0360706
B8ZZL8	0.799087	0.18184	0.263034	0.0459988
B9A041	-0.104697	0.0009565	1	0.103915
C9IY94	-1.18442	0.122456	-1.59946	0.640354
C9IZA5	0.722466	0.191114	0.823749	0.205512
C9IZU3	-1.18442	0.122456	-1.59946	0.640354
C9J0D1	-2.39593	0.19552	-1.25154	0.0459988
C9J0S9	-0.643856	0.0387688	-0.514573	0.0360706
C9J2C0	0.124328	0.00405784	0.263034	0.0459988
C9J2Q4	-1.18442	0.122456	-1.59946	0.640354
C9J386	-4.64386	0.403403	-2.47393	0.108965
C9J4W5	1.11103	0.19552	0.124328	0.0169604
C9J5S7	-0.514573	0.0392914	-0.340075	0.0360706
C9J5W6	-0.358454	0.0521743	0.389567	0.0360706
C9J6D1	-0.0588937	0.0009565	0.443607	0.0360706
C9J7B5	1.11103	0.19552	0.124328	0.0169604
C9J8P9	-0.0291463	0.0009565	0.83996	0.0360706
C9J938	-1.18442	0.122456	-1.59946	0.640354
C9J9K3	0.773996	0.137153	0.536053	0.0459988
C9J9W2	0.604071	0.104633	0.565597	0.0459988
C9JB25	-1.18442	0.122456	-1.59946	0.640354
C9JCQ4	0.773996	0.137153	0.970854	0.154964
C9JCY7	-0.643856	0.0388163	-0.810966	0.0360706
C9JDL2	1	0.19552	1.12433	0.0716554
C9JDS9	0.678072	0.19552	0.422233	0.113735
C9JEV8	0.641546	0.112495	0.298658	0.0360706
C9JFL5	0.0703893	0.0009565	0.163499	0.0360706
C9JFR7	-0.304006	0.0009565	-0.915936	0.090444
C9JFT1	-1.18442	0.122456	-1.59946	0.640354
C9JGE3	-1.73697	0.366027	-1.12029	0.112664
C9JJQ8	0.641546	0.112495	0.298658	0.0360706
C9JKR2	1.59455	0.137153	1	0.0390538
C9JL19	0.773996	0.137153	0.970854	0.154964
C9JL25	0.773996	0.137153	0.970854	0.154964
C9JM50	0.910733	0.0856568	1.53605	0.192668
C9JNW5	-0.666576	0.024798	-0.514573	0.0332015
C9JQ00	0.641546	0.112495	0.298658	0.0360706
C9JQJ4	-1.18442	0.122456	-1.59946	0.640354
C9JRZ8	0.31034	0.111371	-0.761213	0.176982
C9JRZ8-2	0.31034	0.111371	-0.761213	0.176982
C9JSZ1	2.26003	1.01547	1.88753	0.359717
C9JTK6	1.01436	0.19552	1.25096	0.349887
C9JTX5	-0.0740006	0.0009565	-0.0144996	0.00243888
C9JU56	0.111031	0.0009565	0.124328	0.0169604
C9JUG7	0.378512	0.0368263	-0.152003	0.0169604
C9JUM1	0.0143553	0.0009565	0.0285692	0.00669606
C9JUP7	0.722466	0.191114	0.823749	0.205512
C9JV02	-2.55639	1.01547	-2.8365	0.683191
C9JXB8	-0.666576	0.024798	-0.514573	0.0332015
C9JY79	-0.577767	0.0613802	-1.02915	0.192668
C9JZD1	0.411426	0.024844	-0.184425	0.0169604
C9JZI2	-1.18442	0.122456	-1.59946	0.640354
C9JZI7	-0.0588937	0.0009565	0.443607	0.0360706
C9JZR7	0.0143553	0.0009565	0.0285692	0.00669606
C9K028	0	0.0009565	1.28688	0.0469655
C9K0S6	1	0.19552	1.12433	0.0716554
C9K0U8	-0.217591	0.0009565	0.495695	0.0360706
D6R904	-0.577767	0.0856568	-0.535332	0.0459988
D6R956	0.378512	0.00405784	-0.415037	0.0360706
D6R974	0.378512	0.00405784	-0.415037	0.0360706
D6R9P3	0.111031	0.0009565	0.137504	0.0169604
D6RAF8	0	0.0009565	0.0976108	0.0169604
D6RBE9	-0.184425	0.0009565	-1.08927	0.138406
D6RBL5	-0.217591	0.00405784	-0.810966	0.175289
D6RBM0	-0.713119	0.0310037	0.189034	0.0169604
D6RBQ9	0	0.0009565	0.0840643	0.0169604
D6RBZ0	0.111031	0.0009565	0.137504	0.0169604
D6RD18	0.111031	0.0009565	0.137504	0.0169604
D6RDG3	0.704872	0.0856568	0.565597	0.0360706
D6RDU5	-2.55639	1.01547	-2.8365	0.683191
D6RE83	0.378512	0.00405784	-0.415037	0.0360706
D6RER5	-2.55639	1.01547	-2.8365	0.683191
D6RF19	1.4489	0.137153	0.505891	0.0351749
D6RF44	0	0.0009565	0.0976108	0.0169604
D6RF53	0.378512	0.00405784	-0.415037	0.0360706
D6RF93	-1.59946	0.151626	0.189034	0.0169604
D6RG00	0.111031	0.0009565	0.594549	0.192668
D6RGI3	-2.55639	1.01547	-2.8365	0.683191
D6RHD5	1.29278	0.122456	0.773996	0.0360706
D6RIU0	-0.713119	0.0310037	0.189034	0.0169604
E5RFF0	-1.21759	0.122456	-0.415037	0.0332015
E5RFU4	0.422233	0.0388163	0.495695	0.0360706
E5RG13	1.33342	0.19552	0.956057	0.0360706
E5RG95	0	0.0009565	0.263034	0.0188612
E5RGE1	1.51096	0.19552	0.367371	0.0215456
E5RGH4	-0.713119	0.0310037	0.189034	0.0169604
E5RGV0	-0.713119	0.0310037	0.189034	0.0169604
E5RGX5	0.0840643	0.0009565	0.0143553	0.00130484
E5RGZ4	-1.39593	0.0856568	0.0703893	0.00243888
E5RHP0	0	0.0009565	1.28688	0.0469655
E5RI09	0	0.0009565	0.263034	0.0188612
E5RI98	-0.251539	0.0009565	0.641546	0.0902835
E5RIF1	0.111031	0.0009565	0.594549	0.192668
E5RIP1	-0.556393	0.00405784	-1.68966	0.0751007
E5RIP7	1.33342	0.19552	0.956057	0.0360706
E5RIR4	1.02148	0.13763	0.226509	0.0175931
E5RIS7	0.0840643	0.0009565	-0.621488	0.0459988
E5RJ93	0.0840643	0.0009565	-0.621488	0.0459988
E5RJX2	-0.556393	0.00405784	-1.68966	0.0751007
E5RK69	-0.0439433	0.0009565	0.321928	0.0360706
E7EMB3	0.933573	0.0856568	0.0426443	0.00243888
E7EMC6	-0.0439433	0.0009565	0.321928	0.0360706
E7EN40	-0.713119	0.0310037	0.189034	0.0169604
E7EN95	0.0285692	0.0009565	-0.304006	0.0360706
E7ENZ3	-0.104697	0.0009565	0.495695	0.0360706
E7EPK1	-2.55639	1.01547	-2.8365	0.683191
E7EQR4	-1.39593	0.19552	-1.05889	0.0695604
E7ERF2	0.650765	0.0496351	0.0703893	0.00524306
E7ERL0	-0.943416	0.122456	0.344828	0.0175931
E7ES33	-2.55639	1.01547	-2.8365	0.683191
E7ESH4	0.0703893	0.0009565	0.356144	0.0360706
E7ESK7	1.02148	0.13763	0.226509	0.0175931
E7ETZ0	0.933573	0.0856568	0.0426443	0.00243888
E7EUT5	0.411426	0.0828097	0.526069	0.0873529
E7EUY5	-0.217591	0.0009565	0.495695	0.0360706
E7EVS6	0.356144	0.137153	0.226509	0.0360706
E7EVZ2	1.02148	0.13763	0.226509	0.0175931
E7EX29	0.378512	0.19552	0.163499	0.0459988
E7EXB4	0.0703893	0.0009565	0.356144	0.0360706
E9PAV3	0.356144	0.0856568	0.604071	0.18118
E9PAV3-2	0.356144	0.0856568	0.604071	0.18118
E9PC52	0.286881	0.0009565	1.09085	0.0360706
E9PCA1	-0.104697	0.0009565	0.495695	0.0360706
E9PCR7	0.704872	0.0553693	0.555816	0.0360706
E9PCY7	-0.415037	0.19552	0.389567	0.0360706
E9PD24	1.02148	0.13763	0.226509	0.0175931
E9PD68	-0.836501	0.0613802	-0.358454	0.0188612
E9PDF2	0.704872	0.0553693	0.555816	0.0360706
E9PDU6	-0.415037	0.0009565	-0.415037	0.0360706
E9PEB5	0.485427	0.122456	0.678072	0.0459988
E9PFF2	-0.943416	0.19552	-1.39593	0.192668
E9PFG7	0.704872	0.0553693	0.555816	0.0360706
E9PG15	0.925999	0.0856568	0.933573	0.0459988
E9PGC8	1.87184	0.19552	0.432959	0.0318441
E9PH38	-0.473931	0.0009565	-1.51457	0.0672219
E9PHT9	0.286881	0.00405784	0.176323	0.0169604
E9PI26	-0.184425	0.0009565	0.0426443	0.0054629
E9PI65	-0.556393	0.122456	-0.836501	0.212185
E9PI86	0.124328	0.0009565	0.739848	0.0672219
E9PJF0	0.275007	0.0009565	-0.0439433	0.00243888
E9PJF7	-1.08927	0.0856568	-1.25154	0.154964
E9PJJ2	-0.0588937	0.0009565	0.443607	0.0360706
E9PK01	1.1375	0.0613802	0.831877	0.0360706
E9PK25	0.275007	0.034375	0.31034	0.0360706
E9PK54	-0.234465	0.0553693	-0.434403	0.0716554
E9PKD5	0.275007	0.032031	0.124328	0.0169604
E9PKE3	-0.268817	0.105961	-0.643856	0.582528
E9PKT8	-0.0588937	0.0009565	0.443607	0.0360706
E9PLA9	1.08406	0.185153	0.910733	0.146484
E9PLF4	-0.321928	0.0856568	-0.577767	0.186686
E9PLJ3	0.0840643	0.0009565	0.62293	0.0459988
E9PM13	1.79077	0.19552	0.400538	0.02512
E9PM69	0.275007	0.032031	0.124328	0.0169604
E9PMD8	0.0976108	0.0009565	0.214125	0.0360706
E9PN25	-0.104697	0.0009565	-0.286304	0.0390538
E9PN50	0.0976108	0.0009565	0.214125	0.0360706
E9PN89	-0.514573	0.19552	-0.761213	0.536555
E9PNE6	0.545968	0.245728	-0.104697	0.0169604
E9PNJ7	-0.0588937	0.0009565	0.443607	0.0360706
E9PNW0	-0.0588937	0.0009565	0.443607	0.0360706
E9PP21	0.333424	0.00405784	-0.434403	0.0360706
E9PP50	0.495695	0.122456	0.650765	0.0695604
E9PPH5	-0.0740006	0.0009565	0.773996	0.0459988
E9PPQ8	1.40054	0.128077	1.65992	0.186686
E9PPY6	-0.184425	0.0553693	-0.304006	0.0564066
E9PQB7	0.495695	0.122456	0.650765	0.0695604
E9PQC9	1.1375	0.0613802	0.831877	0.0360706
E9PQK7	-0.234465	0.0553693	-0.434403	0.0716554
E9PQQ4	-0.234465	0.0553693	-0.434403	0.0716554
E9PQW4	0.275007	0.0009565	-0.0439433	0.00243888
E9PQZ1	1.1375	0.0613802	0.831877	0.0360706
E9PR30	-0.251539	0.0368263	1.42761	0.683191
E9PRC8	-0.104697	0.0009565	0.659925	0.0360706
E9PRH9	-0.184425	0.0009565	0.650765	0.0360706
E9PRY8	1.1375	0.0613802	0.831877	0.0360706
E9PS34	-0.0588937	0.0009565	0.443607	0.0360706
E9PS65	1.79077	0.19552	0.400538	0.02512
F5GWF6	-0.0439433	0.0009565	-0.217591	0.0189973
F5GX99	1.31034	0.122456	0.378512	0.0169604
F5GXD8	0.516015	0.0045842	0.678072	0.0360706
F5GXH2	-0.535332	0.00405784	-0.643856	0.0360706
F5GXR3	-0.304006	0.0856568	-0.736966	0.205512
F5GXS2	0.214125	0.0009565	0.286881	0.0188612
F5GXY2	-0.535332	0.00405784	-0.643856	0.0360706
F5GYL4	0.650765	0.0496351	0.0703893	0.00524306
F5GYU2	-0.535332	0.00405784	-0.643856	0.0360706
F5GZI8	0.650765	0.0496351	0.0703893	0.00524306
F5H013	-1.02915	0.122456	-1.12029	0.0816551
F5H018	-0.0740006	0.0009565	0.475085	0.0360706
F5H0C8	-0.268817	0.00405784	-0.395929	0.0360706
F5H1C3	-0.268817	0.00405784	-0.395929	0.0360706
F5H284	-1.35845	0.19552	-1.12029	0.0902835
F5H4R6	-0.152003	0.00405784	0.298658	0.0360706
F5H5D3	-0.168123	0.0009565	-0.136062	0.0169604
F5H783	0.516015	0.0045842	0.678072	0.0360706
F5H7R9	-0.304006	0.0856568	-0.736966	0.205512
F5H7S3	-1.35845	0.19552	-1.32193	0.0695604
F6RFD5	0.604071	0.0856568	-0.761213	0.0695604
F6S2S5	1.61353	0.19552	1.45418	0.112664
F6U211	0.0976108	0.0009565	-0.234465	0.0169604
F6UVQ4	0.0703893	0.0009565	0.163499	0.0360706
F6VDH7	-0.0588937	0.0009565	0.0565835	0.0169604
F6XY72	0	0.0009565	1.28688	0.0469655
F8VNW4	0.356144	0.0856568	0.604071	0.18118
F8VP67	2.40054	1.1831	2.89142	1.14267
F8VPF3	-0.251539	0.00405784	0.0840643	0.0169604
F8VQ14	-0.168123	0.0009565	-0.251539	0.0237876
F8VQQ4	-0.68966	0.0856568	-0.761213	0.0695604
F8VR50	0.411426	0.024844	-0.184425	0.0169604
F8VRJ2	-0.0588937	0.0009565	0.443607	0.0360706
F8VRK0	-1.73697	0.19552	-1.2863	0.0902835
F8VRV7	-1.39593	0.19552	0	0.00130484
F8VRZ4	-1.12029	0.122456	-0.621488	0.0360706
F8VS66	-1.12029	0.122456	-0.621488	0.0360706
F8VUG2	2.67356	1.1831	3.02503	1.14267
F8VUX1	-0.152003	0.00405784	0.298658	0.0360706
F8VV59	-0.152003	0.00405784	0.298658	0.0360706
F8VVB5	-0.0588937	0.0009565	0.443607	0.0360706
F8VVB8	1.31034	0.137153	-0.200913	0.0169604
F8VVB9	-0.251539	0.0090399	-0.120294	0.0169604
F8VW18	-1.39593	0.19552	0	0.00130484
F8VWV9	-1.12029	0.122456	-0.621488	0.0360706
F8VX09	-1.12029	0.122456	-0.621488	0.0360706
F8VX93	-1.39593	0.19552	0	0.00130484
F8VXI6	-0.152003	0.00405784	0.298658	0.0360706
F8VXL3	0.565597	0.034375	0.495695	0.0459988
F8VXZ7	-2.18442	0.366027	-2.05889	0.290137
F8VY35	-0.152003	0.00405784	0.298658	0.0360706
F8VZ58	-0.577767	0.0368263	-0.251539	0.0169604
F8VZJ2	0.356144	0.0856568	0.604071	0.18118
F8VZQ9	0.695994	0.0613802	-0.535332	0.0360706
F8VZU9	-0.785875	0.0960965	-0.888969	0.0997968
F8VZY9	0.910733	0.0856568	1.53605	0.192668
F8W020	-0.152003	0.00405784	0.298658	0.0360706
F8W026	0.344828	0.0009565	-1.47393	0.267365
F8W079	-0.473931	0.0856568	-0.104697	0.0169604
F8W0F6	-2.18442	0.366027	-2.05889	0.290137
F8W0J6	-0.152003	0.00405784	0.298658	0.0360706
F8W0P7	0.176323	0.0368263	0.650765	0.0360706
F8W0W4	0.356144	0.0856568	0.604071	0.18118
F8W118	-0.152003	0.00405784	0.298658	0.0360706
F8W180	-0.785875	0.0960965	-0.888969	0.0997968
F8W1I5	0.594549	0.0496351	1.99277	0.683191
F8W1I6	-1.39593	0.19552	0	0.00130484
F8W1N5	0.356144	0.0856568	0.604071	0.18118
F8W1R7	0.0565835	0.0009565	0.286881	0.0360706
F8W1U3	2.40054	1.1831	2.89142	1.14267
F8W543	-0.152003	0.00405784	0.298658	0.0360706
F8W6I7	-0.0144996	0.0009565	-0.200913	0.0169604
F8W726	0.933573	0.112495	1.27501	0.18118
F8W7S5	-0.0892673	0.0009565	0.411426	0.0360706
F8W8I8	-2.55639	1.01547	-2.8365	0.683191
F8W9A8	0.31034	0.0009565	0.15056	0.0169604
F8W9N7	0.378512	0.0368263	-0.152003	0.0169604
F8WAM2	-0.120294	0.0009565	-0.184425	0.0169604
F8WB63	0.0703893	0.0009565	0.163499	0.0360706
F8WB65	-1.18442	0.122456	-1.59946	0.640354
F8WBR5	1.45418	0.137153	0.948601	0.0816551
F8WCH0	-1	0.13763	-0.535332	0.0494891
F8WCJ1	1.11103	0.19552	0.124328	0.0169604
F8WD59	0.879706	0.137153	0.604071	0.0459988
F8WDA3	-0.643856	0.0388163	-0.810966	0.0360706
F8WDH5	-0.643856	0.0388163	-0.810966	0.0360706
F8WE65	-0.514573	0.0392914	-0.340075	0.0360706
F8WE98	0.790772	0.150581	0.0976108	0.0169604
F8WEF0	0.485427	0.0483711	0.298658	0.0188612
G3V113	0.111031	0.0009565	0.594549	0.192668
G3V153	0.432959	0.0349865	0.594549	0.0459988
G3V1A4	0.275007	0.034375	0.31034	0.0360706
G3V1Q4	-2.55639	1.01547	-2.8365	0.683191
G3V1V0	0.0565835	0.0009565	0.286881	0.0360706
G3V1Y7	-0.184425	0.0009565	-0.340075	0.0360706
G3V2A3	0.422233	0.079355	0.815575	0.186686
G3V2F7	0.111031	0.0009565	0.594549	0.192668
G3V2J8	-0.599462	0.0226423	-1.08927	0.0459988
G3V2N5	-0.358454	0.0496351	-0.104697	0.0169604
G3V2N6	-1.68966	0.137153	-1.51457	0.0816551
G3V2R8	-1.68966	0.137153	-1.51457	0.0816551
G3V2W4	-0.713119	0.137153	-0.184425	0.0169604
G3V361	0.432959	0.0009565	-0.286304	0.0169604
G3V3R4	-1.68966	0.137153	-1.51457	0.0816551
G3V461	1.32193	0.132945	0.941106	0.0360706
G3V479	1.45418	0.137153	0.948601	0.0816551
G3V4N7	1.18903	0.122456	0.910733	0.0459988
G3V5W4	-1.68966	0.137153	-1.51457	0.0816551
G3XAL0	-0.304006	0.0613802	-1.08927	0.267365
G5E972	-0.395929	0.0856568	-0.217591	0.0360706
G5E9R0	0.356144	0.137153	0.226509	0.0360706
G8JLA2	0.0565835	0.0009565	0.286881	0.0360706
G8JLB6	-0.415037	0.19552	0.389567	0.0360706
H0Y3Y5	0.31034	0.0009565	0.15056	0.0169604
H0Y3Z3	0.0426443	0.0009565	-0.120294	0.0169604
H0Y4K8	-3.47393	1.01547	-3.47393	0.751536
H0Y586	-0.0291463	0.0009565	0.124328	0.0101499
H0Y7A7	0.933573	0.0856568	0.0426443	0.00243888
H0Y7Z1	-3.47393	1.01547	-3.47393	0.367239
H0Y8C6	0.367371	0.0856568	0.895303	0.351347
H0Y8G5	0	0.0009565	0.0976108	0.0169604
H0Y8S0	1.4957	0.135608	1.11103	0.0459988
H0Y8Y3	0.422233	0.19552	-0.643856	0.175289
H0Y9C7	-0.971431	0.0856568	-1.2863	0.0469655
H0Y9K0	0.238787	0.0009565	-1.21759	0.0469655
H0Y9K4	0.238787	0.0009565	-1.21759	0.0469655
H0Y9Y1	0.704872	0.0856568	0.565597	0.0360706
H0YA55	1.29278	0.122456	0.773996	0.0360706
H0YA96	0	0.0009565	0.0976108	0.0169604
H0YAI7	0.238787	0.0009565	-1.21759	0.0469655
H0YB39	-0.415037	0.19552	0.389567	0.0360706
H0YB80	0.0143553	0.0009565	-0.0144996	0.00243888
H0YBD7	0.263034	0.0496351	0.903038	0.154964
H0YBG7	0.263034	0.0496351	0.903038	0.154964
H0YBL1	1.33342	0.19552	0.956057	0.0360706
H0YBN9	0	0.0009565	0.659925	0.0360706
H0YBT4	-0.621488	0.0368263	0.713696	0.0301184
H0YBX6	0.111031	0.0009565	0.594549	0.192668
H0YC77	-1.21759	0.122456	-0.415037	0.0332015
H0YCT5	0.286881	0.0009565	1.09085	0.0360706
H0YDK2	0.286881	0.0009565	1.09085	0.0360706
H0YE58	1.1375	0.0613802	0.831877	0.0360706
H0YE72	1.1375	0.0613802	0.831877	0.0360706
H0YF10	0.286881	0.0009565	1.09085	0.0360706
H0YF33	-0.184425	0.0009565	0.650765	0.0360706
H0YF61	-1.02915	0.19552	-0.395929	0.0360706
H0YFC6	-0.0740006	0.0009565	0.475085	0.0360706
H0YFX9	-4.64386	1.06702	-2.12029	0.780677
H0YGI8	-0.104697	0.00405784	-0.200913	0.0360706
H0YH80	-0.0144996	0.0009565	-0.200913	0.0169604
H0YH81	-0.415037	0.0856568	0.124328	0.0188612
H0YH88	-0.152003	0.00405784	0.298658	0.0360706
H0YHC3	-0.152003	0.00405784	0.298658	0.0360706
H0YHG0	0.695994	0.0613802	-0.535332	0.0360706
H0YHL1	-1.39593	0.19552	0	0.00130484
H0YHX9	0.356144	0.0856568	0.604071	0.18118
H0YI37	0.0143553	0.0009565	-0.0291463	0.00572685
H0YI43	-1.02915	0.100946	-1.12029	0.0724243
H0YIV0	-0.810966	0.19552	-1.12029	0.33208
H0YIV4	-0.152003	0.00405784	0.298658	0.0360706
H0YJ11	0.189034	0.0009565	-0.0588937	0.00669606
H0YJG0	0.238787	0.122456	0.333424	0.103915
H0YJW3	0.704872	0.19552	0.475085	0.136261
H0YK48	-1.35845	0.19552	-1.32193	0.0695604
H0YKJ4	-1.35845	0.19552	-1.32193	0.0695604
H0YKL9	-0.713119	0.122456	-1.35845	0.188157
H0YKP3	-0.37707	0.0368263	-0.395929	0.0360706
H0YKS4	-0.556393	0.19552	-0.473931	0.112664
H0YKV8	-0.713119	0.122456	-1.35845	0.188157
H0YKX5	-0.37707	0.0368263	-0.395929	0.0360706
H0YKX9	-0.577767	0.116736	-1	0.186686
H0YKZ7	-0.577767	0.116736	-1	0.186686
H0YL33	-0.736966	0.122456	-0.304006	0.0360706
H0YL80	-1.35845	0.19552	-1.32193	0.0695604
H0YLE2	-0.736966	0.122456	-0.304006	0.0360706
H0YLV6	-0.577767	0.116736	-1	0.186686
H0YLY0	-1.2863	0.0960965	-0.761213	0.0360706
H0YM50	-0.666576	0.19552	-0.621488	0.0902835
H0YMD0	-0.556393	0.19552	-0.473931	0.112664
H0YMD9	0.275007	0.0009565	0.321928	0.0215456
H0YMM1	-0.556393	0.19552	-0.473931	0.112664
H0YMT1	0.722466	0.0856568	0.713696	0.0459988
H0YMT9	-0.577767	0.116736	-1	0.186686
H0YMU9	-0.556393	0.19552	-0.473931	0.112664
H0YMW4	-0.577767	0.116736	-1	0.186686
H0YN26	0.722466	0.034375	0.879706	0.0360706
H0YN28	-0.736966	0.122456	-0.304006	0.0360706
H0YN42	-0.556393	0.19552	-0.473931	0.112664
H0YN52	-0.736966	0.122456	-0.304006	0.0360706
H0YN88	1.28096	0.0553693	1.27501	0.0360706
H0YNA0	-0.736966	0.122456	-0.304006	0.0360706
H0YNC7	-1.35845	0.19552	-1.32193	0.0695604
H0YNP5	-0.68966	0.137153	-0.358454	0.0360706
H3BMQ8	0	0.0009565	0.903038	0.0459988
H3BN98	-1.12029	0.0856568	-0.0144996	0.00130484
H3BNC9	1.28096	0.0553693	1.27501	0.0360706
H3BPE7	-0.736966	0.0856568	1.09085	0.0459988
H3BPS8	1.08406	0.116736	1.45418	0.139602
H3BQ34	0.782409	0.0856568	0.111031	0.0169604
H3BQN4	0.918386	0.0960965	1.36177	0.161214
H3BR04	0	0.0009565	0.903038	0.0459988
H3BR68	0.189034	0.0009565	0.918386	0.0997968
H3BR70	1.35614	0.19552	0.526069	0.0695604
H3BT25	0.782409	0.0856568	0.111031	0.0169604
H3BT37	-1.12029	0.0856568	-0.0144996	0.00130484
H3BTJ2	0.782409	0.0856568	0.111031	0.0169604
H3BTN5	1.37851	0.19552	0.443607	0.0902835
H3BU78	0	0.0009565	0.903038	0.0459988
H3BUH7	1.08406	0.116736	1.45418	0.139602
H3BUW1	0.782409	0.0856568	0.111031	0.0169604
H3BV27	-1.12029	0.0856568	-0.0144996	0.00130484
H3BVI6	0.275007	0.0856568	1.57046	0.898941
H7BY16	-0.862496	0.134008	0.163499	0.0169604
H7BY36	-1.73697	0.366027	-1.12029	0.112664
H7BYY1	-1.2863	0.19552	-1.12029	0.0676785
H7BZ94	0.0143553	0.0009565	-0.234465	0.0332015
H7BZJ3	0.516015	0.0553693	-0.836501	0.0902835
H7C013	-0.37707	0.00405784	0.214125	0.0188612
H7C144	0.214125	0.0009565	0.286881	0.0188612
H7C223	-1.32193	0.19552	-1.152	0.351347
H7C2W9	0.111031	0.0009565	0.124328	0.0169604
H7C2Y0	-0.321928	0.0009565	0.0285692	0.00243888
H7C398	0.31034	0.0009565	0.15056	0.0169604
H7C3I1	-0.0588937	0.0009565	0.0565835	0.0169604
H7C3T4	-1.68966	0.664542	-0.434403	0.364919
H7C5W8	0.189034	0.0009565	-0.0588937	0.00669606
H9KV75	-0.395929	0.112495	-0.184425	0.0169604
I3L0A0	0.111031	0.0009565	0.594549	0.192668
I3L0K7	1.52105	0.19552	1.52105	0.186686
I3L0S0	1.20789	0.15515	0.695994	0.0459988
I3L1U9	0.863938	0.13763	0.378512	0.128194
I3L239	1.52105	0.19552	1.52105	0.186686
I3L246	-1.12029	0.0856568	-0.0144996	0.00130484
I3L303	-1.12029	0.0856568	-0.0144996	0.00130484
I3L312	0.516015	0.0856568	0.0840643	0.0169604
I3L397	1.11103	0.19552	0.124328	0.0169604
I3L398	-1.55639	0.19552	-1.39593	0.186686
I3L3D5	0.903038	0.0856568	-0.666576	0.0339991
I3L3P5	0.575312	0.185153	-0.321928	0.0360706
I3L3P7	-1.12029	0.0856568	-0.0144996	0.00130484
I3L3R2	0.356144	0.137153	0.226509	0.0360706
I3L3T1	0.815575	0.0856568	-0.234465	0.0169604
I3L3U6	-0.340075	0.0856568	-0.736966	0.111091
I3L466	0.516015	0.0856568	0.286881	0.02512
I3L4M2	-1.55639	0.19552	-1.39593	0.186686
I3L4N8	1.03562	0.19552	0.545968	0.283162
I3L504	1.11103	0.19552	0.124328	0.0169604
I3NI03	-0.0892673	0.0009565	-0.971431	0.192668
J3KN67	-0.577767	0.127319	-0.577767	0.0360706
J3KND3	0.0565835	0.0009565	0.286881	0.0360706
J3KNE3	1.0072	0.19552	1.46989	0.780677
J3KP15	1.82375	1.01547	0.584963	0.0459988
J3KPD9	-0.943416	0.122456	0.344828	0.0175931
J3KPG2	-1.08927	0.0856568	-1.25154	0.154964
J3KPS3	0.918386	0.0960965	1.36177	0.161214
J3KQ32	1.01436	0.19552	1.25096	0.349887
J3KQE5	-0.0740006	0.0009565	0.475085	0.0360706
J3KRE2	-0.713119	0.19552	0.31034	0.0360706
J3KRY1	-0.713119	0.19552	0.31034	0.0360706
J3KS05	-0.120294	0.0009565	-0.168123	0.0169604
J3KS60	-0.713119	0.19552	0.31034	0.0360706
J3KSR8	-0.761213	0.19552	-0.643856	0.141764
J3KSV6	0.790772	0.0856568	0.978196	0.0459988
J3KT65	0.356144	0.137153	0.226509	0.0360706
J3KT86	0.333424	0.0009565	0.298658	0.0360706
J3KTA4	0.226509	0.0009565	-0.713119	0.0459988
J3KTD6	0.333424	0.0009565	0.298658	0.0360706
J3KTF8	-0.713119	0.19552	0.31034	0.0360706
J3KTL2	-0.761213	0.19552	-0.643856	0.141764
J3KTM9	0.0285692	0.0009565	0.895303	0.112664
J3QKP5	0.790772	0.0856568	0.978196	0.0459988
J3QKQ5	-0.0588937	0.0009565	0.189034	0.0169604
J3QL05	1.82375	1.01547	0.584963	0.0459988
J3QLN8	0.333424	0.0009565	0.298658	0.0360706
J3QQX2	-0.713119	0.19552	0.31034	0.0360706
J3QR41	0.333424	0.0009565	0.298658	0.0360706
J3QR48	0.15056	0.0009565	0.0976108	0.0169604
J3QRS3	-0.0439433	0.0009565	0.201634	0.0235583
K7EIJ8	0.163499	0.0009565	0.687061	0.0695604
K7EIT4	1.63691	0.151626	0.250962	0.0169604
K7EJ44	-1.4344	0.19552	-0.200913	0.0360706
K7EJ74	-0.434403	0.00405784	-0.836501	0.0459988
K7EJ78	1.83188	0.19552	2.35332	0.505011
K7EJH8	-0.836501	0.172954	-0.200913	0.0169604
K7EJP1	1.74416	0.550676	1.28688	0.283162
K7EK77	1.74416	0.550676	1.28688	0.283162
K7EKH5	0.790772	0.0856568	0.978196	0.0459988
K7EKN2	0	0.0009565	0.263034	0.0188612
K7ELA4	-0.120294	0.0009565	-0.168123	0.0169604
K7ELC2	1.83188	0.19552	2.35332	0.505011
K7ELR7	-1.2863	0.122456	-0.152003	0.0169604
K7ELW0	2.45154	0.19552	0.214125	0.0169604
K7EM02	0.163499	0.0009565	0.687061	0.0695604
K7EM20	1.20789	0.588044	0.0426443	0.00572685
K7EM38	0.356144	0.137153	0.226509	0.0360706
K7EM56	1.83188	0.19552	2.35332	0.505011
K7EM90	-0.785875	0.19552	-0.915936	0.154964
K7EN27	2.45154	0.19552	0.214125	0.0169604
K7ENJ4	1.74416	0.550676	1.28688	0.283162
K7ENT6	-1.35845	0.19552	-1.32193	0.0695604
K7EP41	-1.2863	0.122456	-0.152003	0.0169604
K7EP67	-0.434403	0.00405784	-0.836501	0.0459988
K7EPM1	0	0.0009565	0.263034	0.0188612
K7EPY4	-1.2863	0.122456	-0.152003	0.0169604
K7EQ48	-1.2863	0.122456	-0.152003	0.0169604
K7EQA1	0.62293	0.0613802	-0.152003	0.0169604
K7EQH4	1.74416	0.550676	1.28688	0.283162
K7EQJ5	1.83188	0.19552	2.35332	0.505011
K7ERC6	-1.2863	0.122456	-0.152003	0.0169604
K7ERG3	-1.35845	0.19552	-1.32193	0.0695604
K7ERS8	-0.943416	0.19552	-0.971431	0.186686
K7ERX7	1.14405	0.137153	0.765535	0.0360706
K7ES63	0.748461	0.13763	1.37295	0.148436
K7ES69	0.275007	0.0856568	1.57046	0.898941
K7ESF3	0.422233	0.00550688	1.53605	0.261616
K7ESJ4	0.782409	0.034375	1.02148	0.0459988
K7ESM5	0.887525	1.01547	1.28096	0.583526
M0QX14	0.485427	0.0392914	-0.836501	0.0459988
M0QXW7	1.23879	0.19552	1.22033	0.336111
M0QY37	0.485427	0.0392914	-0.836501	0.0459988
M0QY43	-0.971431	0.191114	-1.51457	0.138406
M0QY85	-1.12029	0.0856568	1.67356	0.112664
M0QYH3	1.23879	0.19552	1.22033	0.336111
M0QYM7	-0.217591	0.00405784	0.454176	0.0360706
M0QZ52	1.45418	0.137153	0.948601	0.0816551
M0QZL7	-1.12029	0.0856568	1.67356	0.112664
M0QZQ3	-0.577767	0.0613802	-1.02915	0.192668
M0R042	-0.217591	0.00405784	0.454176	0.0360706
M0R0I5	1.42223	0.137153	0.0426443	0.00243888
M0R0X0	0.485427	0.0392914	-0.836501	0.0459988
M0R1I1	-1.12029	0.0496351	2.27202	0.113735
M0R278	-1.12029	0.0856568	1.67356	0.112664
M0R2D3	-0.0291463	0.0009565	0.650765	0.0716554
O00410	0.367371	0.0856568	0.895303	0.351347
O00410-2	0.367371	0.0856568	0.895303	0.351347
O00410-3	0.367371	0.0856568	0.895303	0.351347
O14556	0.9855	0.19552	1.34483	0.283162
O14737	0.62293	0.0613802	-0.152003	0.0169604
O14737-2	0.62293	0.0613802	-0.152003	0.0169604
O14818	-0.0291463	0.0009565	0.124328	0.0101499
O14818-2	-0.0291463	0.0009565	0.124328	0.0101499
O14818-4	-0.0291463	0.0009565	0.124328	0.0101499
O14950	-0.0439433	0.0009565	0.201634	0.0235583
O14979	0	0.0009565	0.0840643	0.0169604
O14979-2	0	0.0009565	0.0840643	0.0169604
O14979-3	0	0.0009565	0.0840643	0.0169604
O15145	0.411426	0.024844	-0.184425	0.0169604
O15511	0.765535	0.0856568	1.94486	0.283162
O15511-2	0.765535	0.0856568	1.94486	0.283162
O43175	-1.02915	0.19552	-0.321928	0.0360706
O43390	0.333424	0.0009565	0.910733	0.0459988
O43390-2	0.333424	0.0009565	0.910733	0.0459988
O43390-3	0.333424	0.0009565	0.910733	0.0459988
O43390-4	0.333424	0.0009565	0.910733	0.0459988
O43423	0.722466	0.034375	0.879706	0.0360706
O43707	-0.304006	0.0613802	-0.0740006	0.0169604
O43707-2	-0.304006	0.032031	0.0143553	0.00130484
O43707-3	0.214125	0.0009565	0.286881	0.0188612
O43933	0.163499	0.0009565	0.687061	0.0695604
O43933-2	0.163499	0.0009565	0.687061	0.0695604
O60218	1.27501	0.19552	0.910733	0.351347
O60361	-1.55639	0.122456	-1.55639	0.0676785
O60391	0.250962	0.0009565	-0.473931	0.0360706
O60493	0.831877	0.122456	0.411426	0.0360706
O60493-2	0.831877	0.122456	0.411426	0.0360706
O60493-4	0.831877	0.122456	0.411426	0.0360706
O60506	0.333424	0.0009565	0.910733	0.0459988
O60506-2	0.333424	0.0009565	0.910733	0.0459988
O60506-3	0.333424	0.0009565	0.910733	0.0459988
O60506-4	0.333424	0.0009565	0.910733	0.0459988
O60506-5	0.333424	0.0009565	0.910733	0.0459988
O60814	-0.0740006	0.0009565	0.250962	0.0360706
O75369	0.321928	0.00226422	-0.643856	0.0459988
O75369-2	0.321928	0.00226422	-0.643856	0.0459988
O75369-3	0.321928	0.00226422	-0.643856	0.0459988
O75369-4	0.722466	0.0368263	-1.05889	0.0576447
O75369-5	0.722466	0.0368263	-1.05889	0.0576447
O75369-6	0.321928	0.00226422	-0.643856	0.0459988
O75369-7	0.0285692	0.0009565	-0.304006	0.0360706
O75369-8	0.321928	0.00226422	-0.643856	0.0459988
O75369-9	0.321928	0.00226422	-0.643856	0.0459988
O95626	0.722466	0.034375	0.879706	0.0360706
O95881	1.9855	0.366027	1.72247	0.113735
P00338	0.226509	0.00850811	0.0143553	0.00243888
P00338-2	-0.535332	0.00405784	-0.643856	0.0360706
P00338-3	0.226509	0.00850811	0.0143553	0.00243888
P00338-4	0.250962	0.0856568	0.263034	0.0362594
P00338-5	-0.535332	0.00405784	-0.643856	0.0360706
P00367	1.20163	0.143392	1.36737	0.180983
P00558	0.575312	0.295506	0.555816	0.492954
P00558-2	-0.234465	0.0368263	0.111031	0.0169604
P01023	-1.78588	0.19552	-0.340075	0.0189973
P02751	-2.12029	0.19552	-3.32193	0.640354
P02751-10	-2.12029	0.19552	-3.32193	0.640354
P02751-11	-2	0.19552	-3.47393	0.898941
P02751-12	-2	0.19552	-3.47393	0.898941
P02751-13	-2.12029	0.19552	-3.32193	0.640354
P02751-14	-2.12029	0.19552	-3.32193	0.640354
P02751-15	-2.12029	0.19552	-3.32193	0.640354
P02751-17	-2.12029	0.19552	-3.32193	0.640354
P02751-3	-2.12029	0.19552	-3.32193	0.640354
P02751-4	-2.12029	0.19552	-3.32193	0.640354
P02751-5	-2.12029	0.19552	-3.32193	0.640354
P02751-6	-2.12029	0.19552	-3.32193	0.640354
P02751-7	-2.12029	0.19552	-3.32193	0.640354
P02751-8	-2.12029	0.19552	-3.32193	0.640354
P02751-9	-2.12029	0.19552	-3.32193	0.640354
P02768	1.29278	0.122456	0.773996	0.0360706
P02768-2	1.59455	0.137153	1	0.0390538
P02768-3	2.86987	0.153292	2.17313	0.0672219
P04075	0.918386	0.0960965	1.36177	0.161214
P04075-2	0.918386	0.0960965	1.36177	0.161214
P04083	0.189034	0.0387688	0.0703893	0.0169604
P04350	0.189034	0.0154727	1.24489	0.396747
P04406	0.176323	0.00405784	0.214125	0.0360706
P04406-2	0.411426	0.0828097	0.526069	0.0873529
P04908	-3.18442	1.1831	-1.55639	0.780677
P05386	-0.340075	0.00405784	-0.37707	0.0360706
P05783	0.910733	0.0856568	1.53605	0.192668
P05787	2.15056	0.882729	2.52857	0.780677
P05787-2	2.15056	0.882729	2.52857	0.780677
P06576	-0.494109	0.113227	0.0426443	0.0169604
P06733	-0.785875	0.19552	-0.915936	0.154964
P06733-2	-0.395929	0.00405784	-0.736966	0.0360706
P06744	-1.2863	0.122456	-0.152003	0.0169604
P06744-2	-1.2863	0.122456	-0.152003	0.0169604
P06748	0.0285692	0.0009565	0.0565835	0.0169604
P06748-2	0.0285692	0.0009565	0.0565835	0.0169604
P06748-3	-0.0439433	0.0009565	-0.168123	0.0360706
P06753	-1.35845	0.19552	-1.32193	0.0695604
P06753-2	-0.251539	0.0368263	-0.286304	0.0360706
P06753-3	-0.577767	0.0856568	-0.535332	0.0459988
P06753-4	-0.577767	0.0856568	-0.535332	0.0459988
P06753-5	-0.251539	0.0368263	-0.286304	0.0360706
P06753-6	-0.577767	0.0856568	-0.535332	0.0459988
P06753-7	0.367371	0.0856568	0.31034	0.0188612
P06899	-0.0740006	0.0009565	0.250962	0.0360706
P07205	1.09085	0.116736	0.565597	0.0459988
P07237	0.201634	0.0368263	-0.286304	0.0360706
P07355	-0.556393	0.19552	-0.473931	0.112664
P07355-2	-0.556393	0.19552	-0.473931	0.112664
P07437	0.137504	0.0154727	1.01436	0.484259
P07737	0.659925	0.0613802	-0.473931	0.0231917
P07900	-0.514573	0.0387688	-0.286304	0.0169604
P07900-2	-0.514573	0.0387688	-0.286304	0.0169604
P07951	-0.37707	0.0368263	-0.395929	0.0360706
P07951-2	-0.37707	0.0368263	-0.395929	0.0360706
P07951-3	-1.35845	0.19552	-1.32193	0.0695604
P08133	-0.0439433	0.0009565	0.321928	0.0360706
P08133-2	-0.0439433	0.0009565	0.321928	0.0360706
P08238	-0.234465	0.0009565	-0.494109	0.0360706
P08708	1.28096	0.0553693	1.27501	0.0360706
P08727	0.910733	0.0856568	1.53605	0.192668
P08758	-0.217591	0.00405784	-0.810966	0.175289
P08865	0.773996	0.137153	0.536053	0.0459988
P09104	-0.268817	0.00405784	-0.395929	0.0360706
P09104-2	-0.268817	0.00405784	-0.395929	0.0360706
P09211	0.189034	0.0009565	0.238787	0.0188612
P09382	-2.05889	0.185153	-1.4344	0.0469655
P09429	0.15056	0.0009565	0.389567	0.0469655
P09493	-0.37707	0.0368263	-0.395929	0.0360706
P09493-10	-0.37707	0.0368263	-0.395929	0.0360706
P09493-2	-1.2863	0.19552	-1.12029	0.0676785
P09493-3	-0.395929	0.0387688	-0.395929	0.0360706
P09493-4	-0.37707	0.0368263	-0.395929	0.0360706
P09493-5	-1.35845	0.19552	-1.32193	0.0695604
P09493-6	-1.35845	0.19552	-1.32193	0.0695604
P09493-7	-1.2863	0.19552	-1.12029	0.0676785
P09493-8	-1.2863	0.19552	-1.12029	0.0676785
P09493-9	-0.395929	0.0387688	-0.395929	0.0360706
P09496	-0.0291463	0.0009565	0.83996	0.0360706
P09496-2	-0.0291463	0.0009565	0.83996	0.0360706
P09496-3	-0.0291463	0.0009565	0.83996	0.0360706
P09496-4	-0.0291463	0.0009565	0.83996	0.0360706
P09496-5	-0.0291463	0.0009565	0.83996	0.0360706
P09651	-0.0144996	0.0009565	-0.200913	0.0169604
P09651-2	-0.0144996	0.0009565	-0.200913	0.0169604
P09651-3	-0.0144996	0.0009565	-0.200913	0.0169604
P09936	0.378512	0.00405784	-0.415037	0.0360706
P09972	0.790772	0.0856568	0.978196	0.0459988
P0C0S5	-2.39593	0.19552	-1.25154	0.0459988
P0C0S8	-3.18442	1.1831	-1.55639	0.780677
P0CG38	-0.434403	0.0856568	-0.321928	0.0360706
P0CG39	-1.21759	0.19552	-0.810966	0.0459988
P0DMV8-2	0.124328	0.0613802	-0.104697	0.0360706
P0DMV9	0.124328	0.0613802	-0.104697	0.0360706
P0DN26	-1.35845	0.19552	-1.12029	0.0902835
P0DN37	-1.35845	0.19552	-1.12029	0.0902835
P0DP23	0.933573	0.0856568	0.0426443	0.00243888
P0DPH7	0.0143553	0.0009565	-0.0144996	0.00270101
P0DPH7-2	0.15056	0.00405784	0.0976108	0.0169604
P10412	0.15056	0.0009565	0.454176	0.0235583
P10599	0.773996	0.19552	1.59932	0.505011
P10599-2	0.773996	0.19552	1.59932	0.505011
P10809	-0.0892673	0.00405784	-0.0892673	0.0268721
P10809-2	0.565597	0.117703	0.748461	0.103915
P11021	0.0565835	0.0009565	0.454176	0.0695604
P11142	-0.251539	0.0856568	-0.599462	0.588044
P11142-2	-0.415037	0.19552	-0.666576	0.572514
P11177	0.713696	0.122456	0.189034	0.0169604
P11177-2	0.713696	0.122456	0.189034	0.0169604
P11177-3	0.713696	0.122456	0.189034	0.0169604
P12004	0.137504	0.0009565	0.613532	0.0360706
P12277	0.62293	0.122456	0.555816	0.0459988
P12814	-0.395929	0.112495	-0.184425	0.0169604
P12814-2	-0.395929	0.112495	-0.184425	0.0169604
P12814-3	-0.395929	0.112495	-0.184425	0.0169604
P12814-4	-0.395929	0.112495	-0.184425	0.0169604
P13639	-0.0892673	0.0009565	-0.0291463	0.00313823
P13667	1.30451	0.19552	0.485427	0.0360706
P13693	-1.08927	0.0856568	-1.25154	0.154964
P13693-2	-1.08927	0.0856568	-1.25154	0.154964
P13929	-0.836501	0.0387688	0.189034	0.0169604
P13929-2	-0.836501	0.0387688	0.189034	0.0169604
P13929-3	-0.836501	0.0387688	0.189034	0.0169604
P14174	-0.251539	0.0009565	-0.268817	0.0360706
P14550	-0.268817	0.0009565	0.594549	0.0360706
P14618	1.37851	0.19552	0.443607	0.0902835
P14618-2	1.37851	0.19552	0.443607	0.0902835
P14618-3	1.35614	0.19552	0.526069	0.0695604
P14625	0.378512	0.0558629	0.275007	0.0360706
P14649	0.594549	0.0496351	1.99277	0.683191
P15121	0.31034	0.111371	-0.761213	0.176982
P15259	0.765535	0.137153	0.389567	0.0459988
P15311	-1.39593	0.19552	-1.05889	0.0695604
P15531	-0.943416	0.122456	0.344828	0.0175931
P15531-2	-0.943416	0.122456	0.344828	0.0175931
P16104	-3.18442	1.1831	-1.55639	0.780677
P16402	0.15056	0.0009565	0.454176	0.0235583
P16403	0.15056	0.0009565	0.454176	0.0235583
P16949	-0.888969	0.0387688	-0.643856	0.0360706
P16949-2	-0.888969	0.0387688	-0.643856	0.0360706
P17066	-0.0588937	0.0009565	0.111031	0.0169604
P17844	0.226509	0.0009565	-0.713119	0.0459988
P17844-2	0.226509	0.0009565	-0.713119	0.0459988
P17980	0.275007	0.032031	0.124328	0.0169604
P17987	0.650765	0.0496351	0.0703893	0.00524306
P18206	0.83996	0.122456	-0.514573	0.0360706
P18206-2	0.83996	0.122456	-0.514573	0.0360706
P18669	0.443607	0.0950682	0.432959	0.0459988
P19105	-0.0439433	0.0009565	0.201634	0.0235583
P19338	-0.862496	0.134008	0.163499	0.0169604
P19838	-1.59946	0.151626	0.189034	0.0169604
P19838-2	-1.59946	0.151626	0.189034	0.0169604
P19838-3	-1.59946	0.151626	0.189034	0.0169604
P20290	0.704872	0.0856568	0.565597	0.0360706
P20290-2	0.704872	0.0856568	0.565597	0.0360706
P20618	-0.556393	0.0856568	-0.0892673	0.0169604
P20671	-3.18442	1.1831	-1.55639	0.780677
P20742	-1.78588	0.19552	-0.340075	0.0189973
P20742-2	-1.78588	0.19552	-0.340075	0.0189973
P20933	-0.971431	0.0856568	-1.2863	0.0469655
P20962	-0.304006	0.0856568	-0.736966	0.205512
P21291	0.333424	0.00405784	-0.434403	0.0360706
P21333	0.485427	0.19552	-0.0291463	0.0169604
P21333-2	0.485427	0.19552	-0.0291463	0.0169604
P22307	-1.02915	0.19552	-0.395929	0.0360706
P22307-2	-1.02915	0.19552	-0.395929	0.0360706
P22307-4	-1.02915	0.19552	-0.395929	0.0360706
P22307-6	-1.02915	0.19552	-0.395929	0.0360706
P22307-7	-1.02915	0.19552	-0.395929	0.0360706
P22307-8	-1.02915	0.19552	-0.395929	0.0360706
P22314	0	0.0009565	-0.286304	0.0360706
P22314-2	0	0.0009565	-0.286304	0.0360706
P22392	-0.915936	0.122456	0.356144	0.0188612
P22392-2	-0.915936	0.122456	0.356144	0.0188612
P22626	-0.37707	0.00405784	0.367371	0.0360706
P22626-2	-0.217591	0.0009565	0.389567	0.0360706
P23193	0.0840643	0.0009565	-0.621488	0.0459988
P23246	-0.643856	0.0856568	-0.37707	0.0360706
P23246-2	-0.643856	0.0856568	-0.37707	0.0360706
P23284	-0.761213	0.122456	-0.152003	0.0169604
P23497	-0.0439433	0.0009565	0.713696	0.205512
P23526	-0.434403	0.0009565	0.475085	0.0332015
P23527	-0.0740006	0.0009565	0.250962	0.0360706
P23528	0.275007	0.034375	0.31034	0.0360706
P24534	1.13093	0.295506	1.08406	0.192668
P25398	1.07724	0.0496351	0.536053	0.0188612
P25705	1.14405	0.137153	0.765535	0.0360706
P25705-2	1.74416	0.550676	1.28688	0.283162
P25788	-0.68966	0.0553693	-0.358454	0.0360706
P25788-2	-0.68966	0.0553693	-0.358454	0.0360706
P26038	-0.68966	0.0856568	-0.736966	0.0459988
P26447	1.65992	0.122456	-0.514573	0.0360706
P26583	0.15056	0.0009565	0.526069	0.0334828
P26641	0.815575	0.122456	0.344828	0.0360706
P26641-2	0.815575	0.122456	0.344828	0.0360706
P27348	1.0072	0.19552	0.464668	0.0360706
P27361	0.275007	0.0009565	-0.0439433	0.00243888
P27361-2	0.275007	0.0009565	-0.0439433	0.00243888
P27361-3	0.275007	0.0009565	-0.0439433	0.00243888
P28066	0.847997	0.0613802	0.464668	0.0196784
P28072	-1.94342	0.403403	-3.18442	0.660747
P29218	1.33342	0.19552	0.956057	0.0360706
P29218-3	1.33342	0.19552	0.956057	0.0360706
P29401	-0.943416	0.19552	-1.39593	0.192668
P29401-2	-0.943416	0.19552	-1.39593	0.192668
P29692	1.1375	0.0613802	0.831877	0.0360706
P29692-2	1.1375	0.0613802	0.831877	0.0360706
P29692-3	1.1375	0.0613802	0.831877	0.0360706
P29692-4	1.1375	0.0613802	0.831877	0.0360706
P29966	0.263034	0.0009565	0.0143553	0.00222057
P30040	0.454176	0.034375	-0.168123	0.0169604
P30040-2	0.454176	0.034375	-0.168123	0.0169604
P30050	-0.358454	0.0228253	-0.599462	0.0459988
P30086	-0.0740006	0.0009565	1.5008	0.175289
P30101	-0.0588937	0.0009565	0.214125	0.0316105
P30153	-0.473931	0.0009565	-1.51457	0.0672219
P30613	1.75702	0.1645	0.344828	0.0459988
P30613-2	1.75702	0.1645	0.344828	0.0459988
P31150	-0.217591	0.0009565	-0.340075	0.0360706
P31939	0.485427	0.0483711	0.298658	0.0188612
P31939-2	0.485427	0.0483711	0.298658	0.0188612
P31943	-0.415037	0.19552	0.389567	0.0360706
P31946	1.46467	1.01547	0.0840643	0.0169604
P31946-2	1.46467	1.01547	0.0840643	0.0169604
P31947	1.64616	0.723308	0	0.00117418
P31947-2	1.64616	0.723308	0	0.00117418
P31948	0.226509	0.00405784	-0.304006	0.0360706
P31948-2	0.226509	0.00405784	-0.304006	0.0360706
P31948-3	0.226509	0.00405784	-0.304006	0.0360706
P31949	1.41684	0.13763	0.111031	0.0189973
P32119	0.275007	0.138645	0.687061	0.244201
P32780	-0.184425	0.0009565	0.0426443	0.0054629
P32780-2	-0.184425	0.0009565	0.0426443	0.0054629
P33778	-0.0740006	0.0009565	0.250962	0.0360706
P34931	-0.217591	0.0009565	-0.494109	0.0695604
P35241	-1.2863	0.132061	-1.02915	0.0469655
P35241-4	-1.2863	0.132061	-1.02915	0.0469655
P35241-5	-1.2863	0.132061	-1.02915	0.0469655
P35442	0.526069	0.0856568	1.07724	0.113735
P35579	-0.415037	0.0856568	0.0976108	0.0169604
P35579-2	-0.434403	0.0780016	0.137504	0.0169604
P35580	0.863938	0.128077	0.214125	0.0169604
P35580-2	0.863938	0.128077	0.214125	0.0169604
P35580-3	0.863938	0.128077	0.214125	0.0169604
P35580-4	0.863938	0.128077	0.214125	0.0169604
P35580-5	0.863938	0.128077	0.214125	0.0169604
P35637	-0.736966	0.0856568	1.09085	0.0459988
P35637-2	-0.736966	0.0856568	1.09085	0.0459988
P35749	0.0285692	0.0009565	-0.415037	0.0360706
P35749-2	0.0285692	0.0009565	-0.415037	0.0360706
P35749-3	0.0285692	0.0009565	-0.415037	0.0360706
P35749-4	0.0285692	0.0009565	-0.415037	0.0360706
P35998	-0.136062	0.0009565	0.0840643	0.00572685
P35998-2	-0.136062	0.0009565	0.0840643	0.00572685
P36871	-0.152003	0.0009565	-0.785875	0.113735
P36871-2	-0.152003	0.0009565	-0.785875	0.113735
P36871-3	-0.152003	0.0009565	-0.785875	0.113735
P37802	-0.120294	0.0368263	0.15056	0.0360706
P37802-2	-0.120294	0.0368263	0.15056	0.0360706
P38646	0.871844	0.122456	0.731183	0.0459988
P39687	0.722466	0.034375	0.879706	0.0360706
P40227	1.46989	0.19552	1.37295	0.0716554
P40227-2	1.46989	0.19552	1.37295	0.0716554
P40925	-0.104697	0.0009565	1	0.103915
P40925-2	-0.104697	0.0009565	1	0.103915
P40925-3	-0.104697	0.0009565	1	0.103915
P40926	0.250962	0.0206793	-0.915936	0.205512
P40926-2	1.25096	0.0856568	-0.415037	0.0169604
P41250	0.356144	0.00405784	0.454176	0.0360706
P42166	-0.395929	0.0856568	-0.217591	0.0360706
P42167	-0.395929	0.0856568	-0.217591	0.0360706
P42167-2	-0.395929	0.0856568	-0.217591	0.0360706
P42167-3	-0.395929	0.0856568	-0.217591	0.0360706
P46777	-0.0439433	0.0009565	0.0143553	0.00130484
P46783	0.0976108	0.0009565	-0.234465	0.0169604
P46821	1.87184	0.19552	0.432959	0.0318441
P47755	0.378512	0.0368263	-0.152003	0.0169604
P47755-2	0.378512	0.0368263	-0.152003	0.0169604
P48643	-0.104697	0.0009565	0.495695	0.0360706
P48643-2	-0.104697	0.0009565	0.495695	0.0360706
P48741	-0.0439433	0.0009565	0.0565835	0.00935041
P49321	0.124328	0.0009565	0.739848	0.0672219
P49321-2	0.124328	0.0009565	0.739848	0.0672219
P49321-3	0.124328	0.0009565	0.739848	0.0672219
P49321-4	-0.184425	0.0009565	0.650765	0.0360706
P49368	1.20789	0.19552	0.918386	0.205512
P49368-2	1.15704	0.135904	0.903038	0.18118
P49411	-1.73697	0.19552	-0.915936	0.0360706
P49448	1.20163	0.143392	1.36737	0.180983
P49591	1.21412	0.185153	1	0.0360706
P50395	-0.217591	0.0009565	-0.340075	0.0360706
P50395-2	-0.217591	0.0009565	-0.340075	0.0360706
P50479	0.941106	0.0496351	0.485427	0.0189973
P50502	-0.0588937	0.0009565	0.0565835	0.0169604
P50990	-0.304006	0.00651968	0.0703893	0.0169604
P50990-2	-0.304006	0.00651968	0.0703893	0.0169604
P50990-3	-0.304006	0.00651968	0.0703893	0.0169604
P50991	0.0143553	0.0009565	-0.494109	0.0360706
P50991-2	0.0143553	0.0009565	-0.494109	0.0360706
P51843	4.33914	0.0856568	4.3147	0.0459988
P51843-2	4.33914	0.0856568	4.3147	0.0459988
P51991	1.21412	0.19552	1.16993	0.436638
P51991-2	1.21412	0.19552	1.16993	0.436638
P52565	-0.713119	0.19552	0.31034	0.0360706
P52565-2	-0.713119	0.19552	0.31034	0.0360706
P52597	-0.68966	0.0392914	0.9855	0.192668
P52907	0.378512	0.0368263	-0.152003	0.0169604
P54652	-0.666576	0.19552	-0.761213	0.573489
P54727	-0.599462	0.0228253	-0.971431	0.0360706
P55072	-0.0588937	0.0009565	-0.234465	0.0360706
P55209	-0.152003	0.00405784	0.298658	0.0360706
P55209-2	-0.152003	0.00405784	0.298658	0.0360706
P55209-3	-0.152003	0.00405784	0.298658	0.0360706
P55795	-0.810966	0.137153	0.475085	0.0360706
P55854	0.0703893	0.0009565	-0.514573	0.0360706
P55854-2	0.0703893	0.0009565	-0.514573	0.0360706
P57053	-0.0740006	0.0009565	0.250962	0.0360706
P58876	-0.0740006	0.0009565	0.250962	0.0360706
P60174	-0.599462	0.191114	-0.0291463	0.00296329
P60174-1	-0.599462	0.191114	-0.0291463	0.00296329
P60174-4	0.31034	0.0009565	0.669027	0.0360706
P60660	0.0565835	0.0009565	0.286881	0.0360706
P60660-2	0.0565835	0.0009565	0.286881	0.0360706
P60709	0.687061	0.128077	0.378512	0.162601
P60866	-0.556393	0.00405784	-1.68966	0.0751007
P60866-2	-0.556393	0.00405784	-1.68966	0.0751007
P60953	-1.21759	0.122456	-0.971431	0.0672219
P60981	0.604071	0.0856568	-0.761213	0.0695604
P60981-2	0.604071	0.0856568	-0.761213	0.0695604
P61026	-0.0291463	0.0009565	-0.514573	0.0196784
P61158	0.275007	0.0009565	-0.340075	0.0169604
P61604	-0.268817	0.0009565	-0.666576	0.0360706
P61956	0.0703893	0.0009565	-0.514573	0.0360706
P61956-2	0.0703893	0.0009565	-0.514573	0.0360706
P61978	-0.251539	0.0378675	-0.358454	0.0459988
P61978-2	-0.251539	0.0378675	-0.358454	0.0459988
P61978-3	-0.251539	0.0378675	-0.358454	0.0459988
P61981	1.64616	0.723308	0	0.00117418
P62244	-1.12029	0.0856568	-0.0144996	0.00130484
P62258	1.14405	0.282496	-0.0144996	0.00130484
P62258-2	1.54597	0.660549	0.238787	0.0231917
P62308	-1.02915	0.122456	-1.12029	0.0816551
P62310	-0.68966	0.0228253	-2.39593	0.351347
P62701	1.61353	0.19552	1.81147	0.175289
P62714	0	0.0009565	0.659925	0.0360706
P62736	0.15056	0.0368263	0.584963	0.18118
P62805	0.575312	0.0368263	0.321928	0.0169604
P62807	-0.0740006	0.0009565	0.250962	0.0360706
P62826	-0.0740006	0.0009565	0.475085	0.0360706
P62841	1.83188	0.19552	2.35332	0.505011
P62851	-0.200913	0.0009565	0.432959	0.0360706
P62857	0.0565835	0.0009565	-0.514573	0.0360706
P62861	-0.251539	0.0368263	1.42761	0.683191
P62899	0.111031	0.0009565	0.124328	0.0169604
P62899-2	0.111031	0.0009565	0.124328	0.0169604
P62899-3	0.111031	0.0009565	0.124328	0.0169604
P62937	-0.556393	0.0613802	-0.415037	0.0360706
P62937-2	-0.556393	0.0613802	-0.415037	0.0360706
P62942	1.02857	0.122456	0.111031	0.0169604
P63104	0.378512	0.19552	0.163499	0.0459988
P63104-2	0.0143553	0.0009565	-0.0144996	0.00243888
P63220	-1.25154	0.128369	-1.02915	0.0695604
P63241	1.11103	0.19552	0.124328	0.0169604
P63241-2	1.11103	0.19552	0.124328	0.0169604
P63261	0.687061	0.128077	0.378512	0.162601
P63267	0.15056	0.0368263	0.584963	0.18118
P63267-2	-0.0144996	0.0009565	0.659925	0.141764
P67775	0	0.0009565	0.659925	0.0360706
P67775-2	0	0.0009565	0.659925	0.0360706
P67936	-1.35845	0.19552	-1.32193	0.0695604
P67936-2	-1.35845	0.19552	-1.32193	0.0695604
P68032	0.201634	0.0856568	0.594549	0.192668
P68104	0.765535	0.19552	0.464668	0.161214
P68104-2	0.765535	0.19552	0.464668	0.161214
P68133	0.201634	0.0856568	0.594549	0.192668
P68363	-0.168123	0.0009565	-0.136062	0.0169604
P68363-2	-0.268817	0.0228253	-0.0740006	0.0169604
P68366	0.443607	0.19552	0.400538	0.14533
P68366-2	0.443607	0.19552	0.400538	0.14533
P68371	0.367371	0.090658	1.17632	0.406492
P68402	1.0072	0.19552	1.46989	0.780677
P78371	-0.0439433	0.0009565	-0.217591	0.0189973
P78371-2	-0.0439433	0.0009565	-0.217591	0.0189973
P78559	1.87184	0.19552	0.432959	0.0318441
P78559-2	1.87184	0.19552	0.432959	0.0318441
P80365	0.0840643	0.0009565	-0.621488	0.0360706
P82979	0.695994	0.0613802	-0.535332	0.0360706
P83731	-0.666576	0.024798	-0.514573	0.0332015
P83916	-0.120294	0.0009565	-0.168123	0.0169604
P84103	1.72683	0.137153	0.956057	0.0360706
P84103-2	1.72683	0.137153	0.956057	0.0360706
P98160	1.31034	0.185153	1.23879	0.154964
P99999	-0.304006	0.0009565	-0.915936	0.090444
Q00688	-0.434403	0.0613802	-0.321928	0.0188612
Q00839	-0.234465	0.00405784	-0.0588937	0.0169604
Q00839-2	-0.234465	0.00405784	-0.0588937	0.0169604
Q01082	-0.395929	0.00405784	-0.454032	0.0316105
Q01082-2	-0.395929	0.00405784	-0.454032	0.0316105
Q01082-3	-0.395929	0.00405784	-0.454032	0.0316105
Q01130	1.82375	1.01547	0.584963	0.0459988
Q01130-2	1.82375	1.01547	0.584963	0.0459988
Q01844	-1.73697	0.366027	-1.12029	0.112664
Q01844-2	-1.73697	0.366027	-1.12029	0.112664
Q01844-3	-1.73697	0.366027	-1.12029	0.112664
Q01844-5	-1.73697	0.366027	-1.12029	0.112664
Q01844-6	-1.73697	0.366027	-1.12029	0.112664
Q02218	0.704872	0.0553693	0.555816	0.0360706
Q02218-2	0.704872	0.0553693	0.555816	0.0360706
Q02218-3	0.704872	0.0553693	0.555816	0.0360706
Q04837	-0.217591	0.0009565	0.495695	0.0360706
Q04917	1.64616	0.723308	0	0.00117418
Q05639	0.485427	0.172954	0.632268	0.245117
Q06190	-0.943416	0.0387688	0.495695	0.0177288
Q06830	0.632268	0.122456	-0.0144996	0.00130484
Q07955	-0.761213	0.19552	-0.643856	0.141764
Q07955-2	-0.761213	0.19552	-0.643856	0.141764
Q07955-3	-0.761213	0.19552	-0.643856	0.141764
Q08170	0.321928	0.00405784	1.15704	0.175289
Q08752	0.0976108	0.0009565	-0.168123	0.0169604
Q09028	0.286881	0.0009565	1.09085	0.0360706
Q09028-2	0.286881	0.0009565	1.09085	0.0360706
Q09028-3	0.286881	0.0009565	1.09085	0.0360706
Q09028-4	0.286881	0.0009565	1.09085	0.0360706
Q09666	-0.184425	0.00850811	-0.0144996	0.00243888
Q12931	1.52105	0.19552	1.52105	0.186686
Q12931-2	1.52105	0.19552	1.52105	0.186686
Q13162	-1.68966	0.664542	-0.434403	0.364919
Q13185	-0.120294	0.0009565	-0.168123	0.0169604
Q13243	0.321928	0.00405784	1.15704	0.175289
Q13243-3	0.321928	0.00405784	1.15704	0.175289
Q13247	0.321928	0.00405784	1.15704	0.175289
Q13247-3	0.321928	0.00405784	1.15704	0.175289
Q13404	0.111031	0.0009565	0.594549	0.192668
Q13404-1	0.111031	0.0009565	0.594549	0.192668
Q13404-2	0.111031	0.0009565	0.594549	0.192668
Q13404-7	0.111031	0.0009565	0.594549	0.192668
Q13404-8	0.111031	0.0009565	0.594549	0.192668
Q13442	-0.415037	0.0780016	-0.599462	0.18118
Q13509	0.443607	0.19552	0.887525	0.205512
Q13509-2	0.731183	0.882729	1.19535	0.572514
Q13541	0.903038	0.0853396	1.07039	0.0459988
Q13561	-1.39593	0.19552	0	0.00130484
Q13561-2	-1.39593	0.19552	0	0.00130484
Q13561-3	-1.39593	0.19552	0	0.00130484
Q13765	0.356144	0.0856568	0.604071	0.18118
Q13813	1.9486	0.403403	1.91839	0.683191
Q13813-2	1.9486	0.403403	1.91839	0.683191
Q13813-3	1.9486	0.403403	1.91839	0.683191
Q13885	0.443607	0.0856568	1.07039	0.295506
Q14103	0	0.0009565	0.0976108	0.0169604
Q14103-2	0	0.0009565	0.0976108	0.0169604
Q14103-3	0	0.0009565	0.0976108	0.0169604
Q14103-4	0	0.0009565	0.0976108	0.0169604
Q14141	-2.55639	1.01547	-2.8365	0.683191
Q14141-2	-2.55639	1.01547	-2.8365	0.683191
Q14141-3	-2.55639	1.01547	-2.8365	0.683191
Q14141-4	-2.55639	1.01547	-2.8365	0.683191
Q14156	-1.47393	0.0856568	-0.577767	0.0188612
Q14156-2	-1.47393	0.0856568	-0.577767	0.0188612
Q14156-3	-1.47393	0.0856568	-0.577767	0.0188612
Q14157	0.933573	0.112495	1.27501	0.18118
Q14157-1	0.933573	0.112495	1.27501	0.18118
Q14157-3	0.933573	0.112495	1.27501	0.18118
Q14157-4	0.933573	0.112495	1.27501	0.18118
Q14157-5	0.933573	0.112495	1.27501	0.18118
Q14164	-0.621488	0.0378675	0.443607	0.0360706
Q14164-2	-0.621488	0.0378675	0.443607	0.0360706
Q14194	-0.836501	0.0613802	-0.358454	0.0188612
Q14194-2	-0.836501	0.0613802	-0.358454	0.0188612
Q14195	-0.184425	0.0009565	0.731183	0.0360706
Q14195-2	-0.184425	0.0009565	0.731183	0.0360706
Q14315	0.722466	0.0368263	-1.05889	0.0576447
Q14315-2	0.722466	0.0368263	-1.05889	0.0576447
Q14444	1.08406	0.185153	0.910733	0.146484
Q14444-2	1.08406	0.185153	0.910733	0.146484
Q14568	-1.2863	0.191114	-1.51457	0.18118
Q14847	0.333424	0.0496351	0.163499	0.0183173
Q14847-2	0.604071	0.104633	0.565597	0.0459988
Q14847-3	-0.268817	0.022688	-0.454032	0.0672219
Q14974	0.321928	0.0368263	0.748461	0.112664
Q14974-2	0.0285692	0.0009565	0.895303	0.112664
Q15019	-0.836501	0.0856568	-0.621488	0.0459988
Q15019-2	-0.836501	0.0856568	-0.621488	0.0459988
Q15019-3	-0.836501	0.0856568	-0.621488	0.0459988
Q15029	-0.434403	0.00405784	-0.836501	0.0459988
Q15029-2	-0.434403	0.00405784	-0.836501	0.0459988
Q15029-3	-0.434403	0.00405784	-0.836501	0.0459988
Q15084	-0.68966	0.19552	-0.599462	0.192668
Q15084-2	-0.68966	0.19552	-0.599462	0.192668
Q15084-3	-0.68966	0.19552	-0.599462	0.192668
Q15084-4	-0.68966	0.19552	-0.599462	0.192668
Q15084-5	-0.68966	0.19552	-0.599462	0.192668
Q15121	-1.8365	0.19552	-1.73697	0.780677
Q15121-2	-1.8365	0.19552	-1.73697	0.780677
Q15147	0.333424	0.0009565	0.687061	0.0360706
Q15147-2	0.333424	0.0009565	0.687061	0.0360706
Q15147-4	0.333424	0.0009565	0.687061	0.0360706
Q15147-5	0.333424	0.0009565	0.687061	0.0360706
Q15293	2.11103	0.19552	0.739848	0.0360706
Q15293-2	2.11103	0.19552	0.739848	0.0360706
Q15386	2.14405	0.100946	0.970854	0.0360706
Q15386-2	2.14405	0.100946	0.970854	0.0360706
Q15386-3	2.14405	0.100946	0.970854	0.0360706
Q15413	-0.0144996	0.0009565	0.263034	0.0360706
Q15413-2	-0.0144996	0.0009565	0.263034	0.0360706
Q15413-3	-0.0144996	0.0009565	0.263034	0.0360706
Q15417	0.0703893	0.0009565	0.356144	0.0459988
Q15417-2	-0.415037	0.0009565	-0.415037	0.0360706
Q15417-3	0.0703893	0.0009565	0.356144	0.0459988
Q15819	0.111031	0.0009565	0.594549	0.192668
Q15843	0.275007	0.0009565	-0.0740006	0.00506726
Q16181	-2.55639	1.01547	-2.8365	0.683191
Q16181-2	-2.55639	1.01547	-2.8365	0.683191
Q16555	0.0143553	0.0009565	0.0285692	0.00256993
Q16555-2	0.0143553	0.0009565	0.0285692	0.00256993
Q16576	0.286881	0.0009565	1.09085	0.0360706
Q16576-2	0.286881	0.0009565	1.09085	0.0360706
Q16777	-3.18442	1.1831	-1.55639	0.780677
Q16778	-0.0740006	0.0009565	0.250962	0.0360706
Q1JUQ5	1.02857	0.122456	0.111031	0.0169604
Q32Q12	-0.915936	0.122456	0.356144	0.0188612
Q3KNR6	-0.0588937	0.0009565	0.0565835	0.0169604
Q3ZCM7	0.641546	0.19552	1.37851	0.280089
Q49AN9	-1.02915	0.122456	-1.12029	0.0816551
Q4VY19	1.63691	0.151626	0.250962	0.0169604
Q4VY20	1.63691	0.151626	0.250962	0.0169604
Q53FA3	-0.217591	0.0009565	-0.494109	0.0695604
Q562R1	-0.0291463	0.0009565	0.422233	0.0360706
Q56UQ5	-1.08927	0.0856568	-1.25154	0.154964
Q58FF3	-0.0144996	0.0009565	0.31034	0.0218652
Q58FF6	-0.0740006	0.0009565	-1.73697	0.283162
Q58FF7	0.695994	0.122456	0.464668	0.0672219
Q58FF8	-0.810966	0.0856568	-1.51457	0.186686
Q58FG1	-0.599462	0.0226423	-1.08927	0.0459988
Q5BKV1	-0.556393	0.0856568	0.0976108	0.0101499
Q5HYB6	-0.251539	0.0368263	-0.286304	0.0360706
Q5JP01	0.286881	0.0009565	1.09085	0.0360706
Q5JP02	0.286881	0.0009565	1.09085	0.0360706
Q5JP53	0.137504	0.0154727	1.01436	0.484259
Q5JR01	-0.321928	0.024798	0.565597	0.0716554
Q5JRR6	-0.120294	0.0009565	-0.200913	0.0215456
Q5JS37	0.443607	0.0856568	0.584963	0.135786
Q5JS37-2	0.443607	0.0856568	0.584963	0.135786
Q5JWT2	-1.32193	0.0856568	-1.35845	0.0360706
Q5QNW6	-0.0740006	0.0009565	0.250962	0.0360706
Q5QNW6-2	-0.0740006	0.0009565	0.250962	0.0360706
Q5RI18	-1	0.122456	-0.152003	0.0169604
Q5SQY0	0.650765	0.177309	1.47508	0.290137
Q5ST81	0.275007	0.0553693	1.16993	0.336111
Q5SX87	-0.217591	0.0009565	-0.340075	0.0360706
Q5SX91	-0.217591	0.0009565	-0.340075	0.0360706
Q5SZX6	-0.104697	0.0009565	0.659925	0.0360706
Q5SZX9	-0.104697	0.0009565	0.659925	0.0360706
Q5T3N0	0.0143553	0.0009565	-0.862496	0.0672219
Q5T3N1	0.275007	0.00143554	0.189034	0.0169604
Q5T5C7	1.21412	0.185153	1	0.0360706
Q5T624	-0.184425	0.0009565	0.650765	0.0360706
Q5T6W2	-0.251539	0.0368263	-0.358454	0.0360706
Q5T7C4	0.443607	0.19552	0.650765	0.653843
Q5T7N0	-0.0439433	0.0009565	0.0143553	0.00130484
Q5TCU3	-0.37707	0.0368263	-0.395929	0.0360706
Q5VTE0	0.765535	0.19552	0.464668	0.161214
Q5VU77	0.933573	0.112495	1.27501	0.18118
Q5W0H4	-1.08927	0.0856568	-1.25154	0.154964
Q5W0S4	-0.599462	0.0228253	-0.971431	0.0360706
Q5W0S5	-0.599462	0.0228253	-0.971431	0.0360706
Q5W0X3	1.02857	0.122456	0.111031	0.0169604
Q60FE5	0.485427	0.19552	-0.0291463	0.0169604
Q63HN8	0.226509	0.0009565	-0.454032	0.0205427
Q63HN8-4	0.226509	0.0009565	-0.454032	0.0205427
Q6EEV6	0.0703893	0.0009565	-0.514573	0.0360706
Q6FI13	-3.18442	1.1831	-1.55639	0.780677
Q6IS14	1.11103	0.19552	0.124328	0.0169604
Q6PEY2	-0.321928	0.0368263	-0.152003	0.0188612
Q6PFW1	0.31034	0.0009565	0.15056	0.0169604
Q6PFW1-2	0.31034	0.0009565	0.15056	0.0169604
Q6PFW1-3	0.31034	0.0009565	0.15056	0.0169604
Q6PFW1-4	0.31034	0.0009565	0.15056	0.0169604
Q6PFW1-5	0.31034	0.0009565	0.15056	0.0169604
Q6PFW1-7	0.31034	0.0009565	0.15056	0.0169604
Q6S8J3	-0.0144996	0.0009565	-0.0144996	0.00243888
Q6UXD5	-1.88897	0.122456	-0.473931	0.0332015
Q6UXD5-2	-1.88897	0.122456	-0.473931	0.0332015
Q6UXD5-3	-1.88897	0.122456	-0.473931	0.0332015
Q6UXD5-4	-1.88897	0.122456	-0.473931	0.0332015
Q6UXD5-5	-1.88897	0.122456	-0.473931	0.0332015
Q6ZMR3	-0.535332	0.00405784	-0.643856	0.0360706
Q6ZN40	-0.395929	0.0387688	-0.395929	0.0360706
Q6ZU15	-2.55639	1.01547	-2.8365	0.683191
Q71U36	-0.268817	0.00762324	-0.234465	0.0360706
Q71U36-2	-0.268817	0.00762324	-0.234465	0.0360706
Q71UI9	-2.39593	0.19552	-1.25154	0.0459988
Q71UI9-2	-2.39593	0.19552	-1.25154	0.0459988
Q71UI9-3	-4.64386	0.403403	-2.47393	0.108965
Q71UI9-4	-4.64386	0.403403	-2.47393	0.108965
Q71UI9-5	2.54844	1.01547	2.49057	0.40749
Q7L7L0	-3.18442	1.1831	-1.55639	0.780677
Q7Z406	0.0285692	0.0009565	-0.415037	0.0360706
Q7Z406-2	0.0285692	0.0009565	-0.415037	0.0360706
Q7Z406-4	-0.971431	0.191114	-1.51457	0.138406
Q7Z406-5	-0.971431	0.191114	-1.51457	0.138406
Q7Z406-6	0.0285692	0.0009565	-0.415037	0.0360706
Q86SI9	4.852	0.0856568	4.95373	0.0459988
Q86SI9-2	4.852	0.0856568	4.95373	0.0459988
Q86SI9-3	4.852	0.0856568	4.95373	0.0459988
Q86YS6	1.24489	0.0856568	1.09085	0.0459988
Q86YS6-2	1.24489	0.0856568	1.09085	0.0459988
Q8IUE6	-0.358454	0.0009565	0.263034	0.0169604
Q8IWP9	-0.494109	0.19552	-0.621488	0.0672219
Q8IYT4	0.163499	0.0009565	0.687061	0.0695604
Q8IYT4-2	0.163499	0.0009565	0.687061	0.0695604
Q8IZP2	-0.0588937	0.0009565	0.0565835	0.0169604
Q8N0Y7	1.07724	0.122456	0.189034	0.0169604
Q8N257	-0.0740006	0.0009565	0.250962	0.0360706
Q8NBS9	-0.268817	0.0009565	0.713696	0.0360706
Q8NBS9-2	-0.268817	0.0009565	0.713696	0.0360706
Q8NC51	-1.39593	0.0856568	-1.59946	0.0469655
Q8NC51-2	-1.39593	0.0856568	-1.59946	0.0469655
Q8NC51-3	-1.39593	0.0856568	-1.59946	0.0469655
Q8NC51-4	-1.39593	0.0856568	-1.59946	0.0469655
Q8NFI4	-0.0588937	0.0009565	0.0565835	0.0169604
Q8TAA3	-0.0291463	0.0009565	0.124328	0.0101499
Q8TAA3-2	-0.0291463	0.0009565	0.124328	0.0101499
Q8TAA3-5	-0.0291463	0.0009565	0.124328	0.0101499
Q8TDY4	0.163499	0.0009565	0.485427	0.0169604
Q8TDY4-2	0.163499	0.0009565	0.485427	0.0169604
Q8TDY4-3	0.163499	0.0009565	0.485427	0.0169604
Q8TDZ2	0	0.0009565	-0.0439433	0.0119318
Q8TDZ2-2	0	0.0009565	-0.0439433	0.0119318
Q8TDZ2-4	0	0.0009565	-0.0439433	0.0119318
Q8WVC2	-1.25154	0.128369	-1.02915	0.0695604
Q8WWL2	0.0143553	0.0009565	-0.434403	0.0169604
Q8WWL2-2	0.0143553	0.0009565	-0.434403	0.0169604
Q8WWL2-3	0.0143553	0.0009565	-0.434403	0.0169604
Q8WWL2-4	0.0143553	0.0009565	-0.434403	0.0169604
Q8WXG9	-0.836501	0.122456	-1.152	0.103915
Q8WXG9-3	-0.836501	0.122456	-1.152	0.103915
Q8WXG9-4	-0.836501	0.122456	-1.152	0.103915
Q92526	1.46989	0.19552	1.37295	0.0716554
Q92526-2	1.46989	0.19552	1.37295	0.0716554
Q92526-3	1.46989	0.19552	1.37295	0.0716554
Q92599	-2.55639	1.01547	-2.8365	0.683191
Q92599-2	-2.55639	1.01547	-2.8365	0.683191
Q92599-3	-2.55639	1.01547	-2.8365	0.683191
Q92599-4	-2.55639	1.01547	-2.8365	0.683191
Q92688	1.1177	0.122456	0.970854	0.0695604
Q92688-2	1.1177	0.122456	0.970854	0.0695604
Q92841	0.226509	0.0009565	-0.713119	0.0459988
Q92841-1	0.226509	0.0009565	-0.713119	0.0459988
Q92841-2	0.226509	0.0009565	-0.713119	0.0459988
Q92841-3	0.226509	0.0009565	-0.713119	0.0459988
Q92882	0.356144	0.0186345	0.201634	0.0169604
Q92945	0.526069	0.122456	0.464668	0.0469655
Q93045	0.0840643	0.0009565	0.0143553	0.00130484
Q93045-2	0.0840643	0.0009565	0.0143553	0.00130484
Q93077	-3.18442	1.1831	-1.55639	0.780677
Q93079	-0.0740006	0.0009565	0.250962	0.0360706
Q96A08	-0.0740006	0.0009565	-0.184425	0.0169604
Q96AE4	0.485427	0.122456	0.678072	0.0459988
Q96AE4-2	0.485427	0.122456	0.678072	0.0459988
Q96DZ5	0.422233	0.00550688	1.53605	0.261616
Q96GD4	0.333424	0.0009565	0.298658	0.0360706
Q96GD4-2	0.333424	0.0009565	0.298658	0.0360706
Q96GD4-4	0.333424	0.0009565	0.298658	0.0360706
Q96GD4-5	0.333424	0.0009565	0.298658	0.0360706
Q96GW1	0.344828	0.0009565	-1.47393	0.267365
Q96HC4	0.422233	0.19552	-0.643856	0.175289
Q96HC4-4	0.422233	0.19552	-0.643856	0.175289
Q96HC4-6	0.422233	0.19552	-0.643856	0.175289
Q96HC4-7	0.422233	0.19552	-0.643856	0.175289
Q96HU8	1.57531	0.122456	0.226509	0.0169604
Q96HY3	0.432959	0.0009565	-0.286304	0.0169604
Q96KK5	-3.18442	1.1831	-1.55639	0.780677
Q96N46	-0.643856	0.0388163	-0.810966	0.0360706
Q96N46-2	-0.643856	0.0388163	-0.810966	0.0360706
Q96N46-3	-0.643856	0.0388163	-0.810966	0.0360706
Q96QV6	-3.18442	1.1831	-1.55639	0.780677
Q99439	0.275007	0.0856568	1.57046	0.898941
Q99439-2	0.275007	0.0856568	1.57046	0.898941
Q99497	2.45154	0.19552	0.214125	0.0169604
Q99729	0.782409	0.19552	0.731183	0.154964
Q99729-2	0.111031	0.0009565	0.137504	0.0169604
Q99729-3	0.111031	0.0009565	0.137504	0.0169604
Q99729-4	0.782409	0.19552	0.731183	0.154964
Q99733	-0.0588937	0.0009565	0.443607	0.0360706
Q99733-2	-0.0588937	0.0009565	0.443607	0.0360706
Q99798	0.0703893	0.0009565	0.485427	0.0360706
Q99832	-0.120294	0.0009565	-0.184425	0.0169604
Q99832-3	-0.120294	0.0009565	-0.184425	0.0169604
Q99877	-0.0740006	0.0009565	0.250962	0.0360706
Q99878	-3.18442	1.1831	-1.55639	0.780677
Q99879	-0.0740006	0.0009565	0.250962	0.0360706
Q99880	-0.0740006	0.0009565	0.250962	0.0360706
Q9BQE3	-0.168123	0.0009565	-0.136062	0.0169604
Q9BRL6	0.137504	0.0009565	-0.184425	0.0169604
Q9BRL6-2	0.137504	0.0009565	-0.184425	0.0169604
Q9BTM1	-3.18442	1.1831	-1.55639	0.780677
Q9BTM1-2	-2.39593	0.19552	-1.25154	0.0459988
Q9BTT0	-0.0740006	0.0009565	0.773996	0.0459988
Q9BTT0-3	-0.0740006	0.0009565	0.773996	0.0459988
Q9BUF5	0.887525	1.01547	1.28096	0.583526
Q9BVA1	0.505891	0.0856568	1.1375	0.351347
Q9BWD1	0.773996	0.0613802	-0.434403	0.0360706
Q9BWD1-2	0.773996	0.0613802	-0.434403	0.0360706
Q9BXL8	0	0.0009565	-1.2863	0.0360706
Q9BYX7	1.0635	0.259243	0.678072	0.267365
Q9BYZ2	-0.535332	0.00405784	-0.643856	0.0360706
Q9BZK3	-0.577767	0.0368263	-0.251539	0.0169604
Q9GZV4	1.11103	0.19552	0.124328	0.0169604
Q9H078	1.31034	0.122456	0.378512	0.0169604
Q9H078-2	1.31034	0.122456	0.378512	0.0169604
Q9H078-3	1.31034	0.122456	0.378512	0.0169604
Q9H1E3	-1.94342	0.723308	-1.94342	0.436638
Q9H1E3-2	-1.94342	0.723308	-1.94342	0.436638
Q9H211	-0.643856	0.00405784	-0.736966	0.0231917
Q9H254	-0.577767	0.0613802	-1.02915	0.192668
Q9H254-2	-0.577767	0.0613802	-1.02915	0.192668
Q9H254-4	-0.577767	0.0613802	-1.02915	0.192668
Q9H4B7	0.545968	0.1645	1.5008	0.285167
Q9H853	0.250962	0.00405784	0.226509	0.0215456
Q9NQ11	0.238787	0.0009565	-1.21759	0.0469655
Q9NQ11-2	0.238787	0.0009565	-1.21759	0.0469655
Q9NQ11-3	0.238787	0.0009565	-1.21759	0.0469655
Q9NTK5	1.01436	0.19552	1.25096	0.349887
Q9NTK5-3	1.01436	0.19552	1.25096	0.349887
Q9NVA2	-2.55639	1.01547	-2.8365	0.683191
Q9NVA2-2	-2.55639	1.01547	-2.8365	0.683191
Q9NY65	0.124328	0.00405784	0.263034	0.0459988
Q9NY65-2	0.124328	0.00405784	0.263034	0.0459988
Q9P2E9	-0.0892673	0.0009565	0.411426	0.0360706
Q9P2E9-3	-0.0892673	0.0009565	0.411426	0.0360706
Q9UHV9	0	0.0009565	0.226509	0.0169604
Q9UI15	-0.358454	0.0521743	0.389567	0.0360706
Q9UK61	0.687061	0.0856568	1.04264	0.0626828
Q9UK61-2	0.687061	0.0856568	1.04264	0.0626828
Q9UK61-3	0.687061	0.0856568	1.04264	0.0626828
Q9UK61-4	0.687061	0.0856568	1.04264	0.0626828
Q9UKY7	1.04963	0.137153	-0.321928	0.0188612
Q9UKY7-2	1.04963	0.137153	-0.321928	0.0188612
Q9ULK4	-1.32193	0.0856568	-1.35845	0.0360706
Q9ULK4-2	-1.32193	0.0856568	-1.35845	0.0360706
Q9ULK4-3	-1.32193	0.0856568	-1.35845	0.0360706
Q9ULK4-4	-1.32193	0.0856568	-1.35845	0.0360706
Q9ULK4-5	-1.32193	0.0856568	-1.35845	0.0360706
Q9ULK4-6	-1.32193	0.0856568	-1.35845	0.0360706
Q9ULL8	-1.68966	0.0613802	-3.05889	0.154964
Q9ULL8-2	-1.68966	0.0613802	-3.05889	0.154964
Q9ULX9	1.1177	0.0856568	0.0565835	0.00572685
Q9Y281	0.495695	0.122456	0.650765	0.0695604
Q9Y281-3	0.495695	0.122456	0.650765	0.0695604
Q9Y2V2	-0.268817	0.0009565	0.124328	0.0169604
Q9Y490	-0.152003	0.00405784	0.0426443	0.0101499
Q9Y4F3	1.31034	0.137153	-0.200913	0.0169604
Q9Y4F3-3	1.31034	0.137153	-0.200913	0.0169604
Q9Y4F3-4	1.31034	0.137153	-0.200913	0.0169604
Q9Y4F3-5	1.31034	0.137153	-0.200913	0.0169604
Q9Y4G6	0.722466	0.0856568	0.713696	0.0459988
Q9Y536	-1.35845	0.19552	-1.12029	0.0902835
Q9Y5S2	-1.2863	0.0960965	-0.761213	0.0360706
R4GNH3	0.275007	0.032031	0.124328	0.0169604
S4R359	-0.599462	0.0553693	0.214125	0.0169604
S4R3N1	0.831877	0.137153	0.344828	0.0695604
S4R417	1.83188	0.19552	2.35332	0.505011
S4R456	1.83188	0.19552	2.35332	0.505011
U3KPZ0	0.356144	0.0009565	1.07724	0.0469655
U3KQF3	0.356144	0.0009565	1.07724	0.0469655
U3KQK0	-0.0740006	0.0009565	0.250962	0.0360706
V9GZ17	-0.234465	0.00405784	-0.268817	0.0226423
X6RJP6	-0.104697	0.00405784	0.111031	0.0339991
